# Supplementary material
Source: PubMed Central journal article supplement (PMC7561581)
Supplement: mmc6.pdf [file mmc6.pdf]

| Study                   | Year | Type of study   | Country                                | Total_Sample Size | ICU_Sample Size | Non_ICU_Sample Size | Survival_Sample Size | Mortality_Sample Size | Total_Mean age |
|-------------------------|------|-----------------|----------------------------------------|-------------------|-----------------|---------------------|----------------------|-----------------------|----------------|
| Chaofin Huang           | 2020 | cohort          | China                                  | 41                | 13              | 28                  | 35                   | 6                     |                |
| Chen Chen (1)           | 2020 | cohort          | China                                  | 150               | 24              | 126                 | 139                  | 11                    |                |
| Chen Chen (2)           | 2020 | cohort          | China                                  | 132               | 22              | 110                 | 119                  | 13                    | 63.46          |
| Christopher T. Rentisch | 2020 | cohort          | USA                                    | 297               | 122             | 175                 |                      |                       | 66.96          |
| Conversano Andrea       | 2020 | case series     | Italy                                  | 191               | 22              | 169                 | 149                  | 42                    | 69.4           |
| Corrado Lodigiani       | 2020 | cohort          | Italy                                  | 388               | 61              | 327                 | 296                  | 12                    | 65.33          |
| Daniel Gagiannis        | 2020 | cohort          | Germany                                | 22                | 11              | 11                  | 18                   | 4                     |                |
| Dawei Wang (1)          | 2020 | case series     | China                                  | 138               | 36              | 102                 | 132                  | 6                     | 55.33          |
| Dawei Wang (2)          | 2020 | case series     | China                                  | 107               |                 |                     | 88                   | 19                    | 50.66          |
| E Sney                  | 2020 | cohort          | UK                                     | 2217              |                 |                     | 1606                 | 611                   | 71.66          |
| Fan Zhang               | 2020 | cohort          | China                                  | 48                |                 |                     | 31                   | 17                    | 70.58          |
| Fei Zhou                | 2020 | cohort          | China                                  | 191               | 50              | 141                 | 137                  | 54                    | 56.33          |
| Filippo Lagi            | 2020 | cohort          | Italy                                  | 84                | 16              | 68                  | 76                   | 8                     | 61.66          |
| GE Heng                 | 2020 | cohort          | China                                  | 51                | 51              |                     | 39                   | 12                    | 69             |
| Graziella Bonetti       | 2020 | cohort          | Italy                                  | 144               |                 |                     | 74                   | 70                    | 68.83          |
| Haiying Sun             | 2020 | case control    | China                                  | 244               |                 |                     | 123                  | 121                   | 69.81          |
| Hie Kwigwe              | 2020 | cohort          | China                                  | 54                |                 |                     | 28                   | 26                    | 67.36          |
| Hua Fan                 | 2020 | cohort          | China                                  | 73                | 73              |                     | 26                   | 47                    | 58.36          |
| Jessica Ferguson        | 2020 | cohort          | USA                                    | 72                | 21              | 51                  |                      |                       | 58.13          |
| Jianguo Zhang           | 2020 | cohort          | China                                  | 135               | 30              | 105                 |                      |                       | 55.33          |
| Jianli Cao              | 2020 | case series     | China                                  | 102               | 18              | 84                  |                      |                       | 52.66          |
| Jixiang Zhang           | 2020 | cohort          | China                                  | 541               |                 |                     | 488                  | 53                    | 57.61          |
| Joseph E. Ebinger       | 2020 | cohort          | USA                                    | 214               | 77              | 137                 |                      |                       | 62.92          |
| Kun Wang (A)            | 2020 | cohort          | China                                  | 296               |                 |                     | 277                  | 19                    | 47.32          |
| Kun Wang (B)            | 2020 | cohort          | China                                  | 44                |                 |                     | 30                   | 14                    | 55.2           |
| Kunhua Li               | 2020 | cohort          | China                                  | 83                | 25              | 58                  |                      |                       | 45.5           |
| Kyung Soo Hong          | 2020 | cohort          | South Korea                            | 98                | 13              | 85                  | 93                   | 5                     | 55.4           |
| Lang Wang               | 2020 | cohort          | China                                  | 339               |                 |                     | 274                  | 65                    |                |
| Lin Fu                  | 2020 | case-cohort     | China                                  | 200               |                 |                     | 166                  | 34                    | 70             |
| Michael G Argenziano    | 2020 | case series     | USA                                    | 850               | 236             | 614                 | 664                  | 189                   | 63.44          |
| Min Cao                 | 2020 | cohort          | China                                  | 198               | 19              | 174                 |                      |                       | 50.1           |
| Mohamad Nikopourghadam  | 2020 | case series     | Iran                                   | 2964              |                 |                     | 2725                 | 239                   |                |
| Nicola Galzotti         | 2020 | case series     | Italy                                  | 279               |                 |                     | 170                  | 109                   | 70.66          |
| Peng Yudong             | 2020 | cohort          | China                                  | 112               | 16              | 96                  | 95                   | 17                    | 61.3           |
| Qibin Liu               | 2020 | cohort          | China                                  | 340               |                 |                     | 310                  | 30                    | 57.51          |
| Qing Deng               | 2020 | cohort          | China                                  | 112               | 26              | 86                  | 98                   | 14                    | 61.6           |
| Qingchun Yao            | 2020 | cohort          | China                                  | 108               |                 |                     | 96                   | 12                    | 49             |
| Rahul Shekhar           | 2020 | cohort          | USA                                    | 50                | 34              | 16                  | 37                   | 13                    |                |
| Ronghui Du (1)          | 2020 | cohort          | China                                  | 179               |                 |                     | 158                  | 21                    | 57.6           |
| Ronghui Du (2)          | 2020 | cohort          | China                                  | 109               | 51              | 58                  |                      | 109                   | 70.7           |
| Ruchong Chen            | 2020 | cohort          | China                                  | 1590              |                 |                     | 1540                 | 50                    |                |
| SCOTT W. KEYCHAM        | 2020 | case series     | USA                                    | 13                | 6               | 7                   | 11                   | 2                     | 61             |
| Shaobo Shi (1)          | 2020 | cohort          | China                                  | 671               |                 |                     | 609                  | 62                    | 61.66          |
| Shi Tai                 | 2020 | cohort          | China                                  | 332               | 58              | 274                 |                      |                       | 50             |
| Tao Chen                | 2020 | cohort          | China                                  | 274               |                 |                     | 161                  | 113                   | 58.66          |
| Tian Gu                 | 2020 | case control    | China                                  | 275               |                 |                     | 181                  | 94                    | 66.4           |
| Todd J. Levy            | 2020 | cohort          | USA                                    | 1905              |                 |                     | 8499                 | 2596                  |                |
| Wang Lang               | 2020 | cohort          | China                                  | 202               |                 |                     | 169                  | 33                    | 61.3           |
| Wei-Jie Guan            | 2020 | cohort          | China                                  | 1590              | 99              | 1491                | 1540                 | 50                    | 48.9           |
| Wentao Ni               | 2020 | cohort          | China                                  | 176               |                 |                     | 116                  | 60                    | 65.66          |
| Xian Zhou               | 2020 | case series     | China                                  | 110               |                 |                     | 101                  | 9                     | 57.7           |
| Xiaobo Yang             | 2020 | cohort          | China                                  | 52                |                 |                     | 20                   | 32                    | 59.2           |
| Xiaojing Zou            | 2020 | cohort          | China                                  | 154               | 154             |                     | 102                  | 52                    | 60.68          |
| Xu Chen                 | 2020 | cohort          | China                                  | 291               | 50              | 241                 |                      |                       | 46.3           |
| Yan Deng                | 2020 | cohort          | China                                  | 225               |                 |                     | 116                  | 109                   |                |
| Yongli Zheng            | 2020 | cohort          | China                                  | 99                | 32              | 67                  |                      |                       | 49.4           |
| Yujuan Liu              | 2020 | case control    | China                                  | 291               | 26              | 265                 | 290                  | 1                     | 48.03          |
| Al-Ping Yang            | 2020 | cohort          | China                                  | 93                |                 |                     |                      |                       | 46.4           |
| Aiqi Xi                 | 2020 | cohort          | China                                  | 18                |                 |                     |                      |                       |                |
| Alberto Zangrillo       | 2020 | case series     | Italy                                  | 73                | 73              |                     | 56                   | 17                    |                |
| Alexander C. Bazzari    | 2020 | cross-sectional | USA                                    | 2154              |                 |                     |                      | 2154                  |                |
| Amaro Nunes Duarte-Neto | 2020 | case series     | Brazil                                 | 10                | 7               | 3                   |                      | 10                    |                |
| Anuradha Lala           | 2020 | cohort          | USA                                    | 2736              |                 |                     | 2230                 | 506                   |                |
| Arthur Simonne          | 2020 | cohort          | France                                 | 124               | 124             |                     | 106                  | 18                    | 60.33          |
| Benjamin T. Bradley     | 2020 | cohort          | USA                                    | 12                |                 |                     |                      |                       |                |
| Bicheng Zhang           | 2020 | cohort          | China                                  | 82                |                 |                     | 82                   |                       | 72.5           |
| Bo XU                   | 2020 | cohort          | China                                  | 187               |                 |                     | 159                  | 28                    | 60.5           |
| Bo Zhou                 | 2020 | cohort          | China                                  | 34                |                 |                     |                      |                       | 64.74          |
| Casas Rojo, José Manuel | 2020 | cohort          | Spain                                  | 6,424             | 482             | 5942                | 5069                 | 1355                  | 68.03          |
| Chamin Wu (1)           | 2020 | cohort          | China                                  | 201               | 53              | 148                 | 157                  | 44                    | 51.33          |
| Chamin Wu (2)           | 2020 | cohort          | China                                  | 188               | 50              |                     |                      |                       | 51.9           |
| Christopher M Petrilli  | 2020 | cohort          | USA                                    | 2741              |                 |                     |                      |                       | 62.6           |
| Congliang Miao          | 2020 | cohort          | China                                  | 62                |                 |                     |                      |                       | 43.8           |
| David A. Kolin          | 2020 | cohort          | UK                                     | 669               |                 |                     |                      |                       | 57.5           |
| Di Qi                   | 2020 | cohort          | China                                  | 267               | 53              |                     |                      |                       | 49.33          |
| E.K.Jeong               | 2020 | case series     | Korea                                  | 7755              |                 |                     | 7689                 | 66                    |                |
| Edward Itelman          | 2020 | cohort          | Israel                                 | 162               | 24              | 138                 | 157                  | 5                     | 52             |
| Elio Benetti            | 2020 | cohort          | Italy                                  | 35                |                 |                     |                      |                       |                |
| E_Zhai                  | 2020 | cohort          | China                                  | 161               |                 |                     |                      |                       | 45.16          |
| F.A. Klok               | 2020 | cohort          | Netherlands                            | 184               | 184             |                     | 161                  | 23                    | 64             |
| Fan Yang                | 2020 | cohort          | China                                  | 92                |                 |                     |                      | 92                    | 69.8           |
| Fang Liu (1)            | 2020 | cohort          | China                                  | 10                |                 |                     |                      |                       | 62             |
| Fang Liu (2)            | 2020 | cohort          | China                                  | 140               |                 |                     |                      |                       | 64.26          |
| Farhaan S. Vahidy       | 2020 | cross-sectional | USA                                    | 754               |                 |                     |                      |                       | 53.2           |
| Farhana Latif           | 2020 | case series     | USA                                    | 28                |                 |                     | 21                   | 7                     | 62.66          |
| Fatih Ostirk            | 2020 | cohort          | Turkey                                 | 51                |                 |                     | 48                   | 3                     | 49.2           |
| Fatling Zhou            | 2020 | cohort          | China                                  | 197               | 56              | 169                 | 28                   | 28                    | 55.94          |
| Fei Shao                | 2020 | cohort          | China                                  | 136               | 23              | 113                 |                      |                       | 69             |
| Fengqiang Song          | 2020 | cohort          | China                                  | 54                |                 |                     |                      |                       |                |
| Francesca Bravi         | 2020 | case control    | Italy                                  | 1603              |                 |                     | 909                  | 154                   | 58             |
| Franklin L. Wright      | 2020 | cohort          | USA                                    | 44                |                 |                     |                      |                       | 51.66          |
| Frederick S. Buckner    | 2020 | cohort          | USA                                    | 105               |                 |                     |                      |                       |                |
| Gabriel A Brat          | 2020 | cohort          | USA, France, Italy, Germany, Singapore | 27,584            |                 |                     |                      |                       |                |
| Giacomo Grasselli       | 2020 | case series     | Italy                                  | 1591              | 1591            |                     |                      |                       | 63             |
| Gioè Gabriele Secco     | 2020 | cohort          | Italy                                  | 31                |                 |                     | 28                   | 3                     | 72.3           |
| Guang Chen              | 2020 | cohort          | China                                  | 21                |                 |                     |                      |                       | 56.3           |
| Guo-Qing Qian           | 2020 | case series     | China                                  | 91                | 9               |                     |                      |                       | 47.83          |
| Guojin Zhang            | 2020 | cohort          | China                                  | 221               | 32              | 189                 | 209                  | 12                    | 53.5           |
| Helen Fogarty           | 2020 | cohort          | Ireland                                | 23                | 23              |                     | 20                   | 13                    | 62             |
| Helena Barrasa          | 2020 | cohort          | Spain                                  | 48                | 48              |                     | 32                   | 16                    | 61             |
| Heshui Shi              | 2020 | cohort          | China                                  | 81                |                 |                     |                      |                       | 49.5           |
| Huan Han                | 2020 | cohort          | China                                  | 273               |                 |                     | 249                  | 24                    | 58.86          |
| Huiyan Xu               | 2020 | cohort          | China                                  | 53                | 8               |                     |                      |                       |                |
| Hui Dai                 | 2020 | cohort          | China                                  | 234               |                 |                     |                      |                       |                |
| Hui Hui                 | 2020 | cohort          | China                                  | 41                |                 |                     |                      |                       | 48.83          |
| Ignacio Garcia-Olve     | 2020 | cohort          | Spain                                  | 21                |                 |                     |                      |                       | 59.9           |
| Ji Zhang                | 2020 | cohort          | China                                  | 163               |                 |                     |                      |                       | 55.6           |
| Jean-Luc Murk           | 2020 | cohort          | Netherlands                            | 100               |                 |                     |                      |                       |                |
| Jia-Fu Wei              | 2020 | cohort          | China                                  | 101               | 31              | 70                  | 98                   | 3                     | 48.33          |

| Study               | Year | Type of study   | Country     | Total_Sample Size | ICU_Sample Size | Non ICU_Sample Size | Survival_Sample Size | Mortality_Sample Size | Total_Mean age |
|---------------------|------|-----------------|-------------|-------------------|-----------------|---------------------|----------------------|-----------------------|----------------|
| Jian Chen           | 2020 | cohort          | China       | 101               | 101             |                     |                      |                       |                |
| Jian Wu             | 2020 | cohort          | China       | 80                |                 |                     |                      |                       | 46             |
| Jiangshan Lian (1)  | 2020 | cohort          | China       | 465               | 4               | 461                 |                      |                       | 45.83          |
| Jiangshan Lian (2)  | 2020 | cohort          | China       | 788               |                 |                     | 322                  | 466                   | 46.6           |
| Jianhong Fu         | 2020 | cohort          | China       | 75                | 16              | 59                  |                      |                       |                |
| Jiaofeng Huang      | 2020 | cohort          | China       | 344               |                 |                     | 329                  | 15                    |                |
| Jie Chen            | 2020 | cohort          | China       | 1087              |                 |                     | 1067                 | 20                    | 59.33          |
| Jing Yuan           | 2020 | cohort          | China       | 94                |                 |                     | 94                   |                       |                |
| Jin-jin Zhang       | 2020 | cohort          | China       | 140               |                 |                     |                      |                       |                |
| Julie Helms         | 2020 | cohort          | France      | 150               | 150             | 0                   |                      |                       | 62.33          |
| Jun Fei             | 2020 | case-cohort     | China       | 190               |                 |                     |                      |                       |                |
| Juan Zhang          | 2020 | cohort          | China       | 111               |                 |                     |                      |                       | 29.66          |
| K. Wang             | 2020 | cohort          | China       | 114               |                 |                     |                      |                       |                |
| Kajin Xu            | 2020 | cohort          | China       | 113               |                 |                     | 111                  | 2                     | 52.66          |
| Kim Lindsay         | 2020 | cohort          | USA         | 2491              |                 |                     |                      |                       | 62.33          |
| Kui Liu             | 2020 | cohort          | China       | 137               |                 |                     |                      |                       | 55             |
| Lei Gao             | 2020 | cohort          | China       | 54                |                 |                     | 36                   | 18                    | 60.4           |
| Leonidas Palaodimos | 2020 | cohort          | USA         | 200               | 32              | 168                 | 152                  | 48                    | 62.5           |
| Li Yin              | 2020 | case-control    | China       | 45                |                 |                     | 43                   | 2                     | 52.4           |
| Li Zhang            | 2020 | cross-sectional | China       | 143               | 15              | 128                 | 111                  | 32                    | 63             |
| Lijiao Zeng         | 2020 | cohort          | China       | 338               |                 |                     |                      |                       | 49             |
| Lijun Sun           | 2020 | cohort          | China       | 55                |                 |                     | 55                   | 0                     | 45.98          |
| Ling Mao            | 2020 | case-series     | China       | 214               |                 |                     |                      |                       | 52.7           |
| Lu lin              | 2020 | cohort          | China       | 95                |                 |                     | 95                   | 0                     | 45.3           |
| Marco Vicenzi       | 2020 | cohort          | Italy       | 40                |                 |                     |                      |                       | 64             |
| Matt Arentz         | 2020 | cohort          | USA         | 21                |                 |                     |                      |                       | 70             |
| Matthew J Cummings  | 2020 | cohort          | USA         | 257               |                 |                     | 156                  | 101                   | 63.66          |
| Mingyue Li          | 2020 | cohort          | China       | 83                |                 |                     | 77                   | 6                     | 45.66          |
| Miriam Estebanez    | 2020 | cohort          | Spain       | 256               |                 |                     |                      |                       | 63.7           |
| Nian Hong           | 2020 | cohort          | China       | 56                |                 |                     |                      |                       | 48             |
| Nanshan Chen        | 2020 | cohort          | China       | 99                | 23              | 76                  | 88                   | 11                    | 55.5           |
| Neo Poyiadi         | 2020 | cohort          | Spain       | 328               | 82              | 246                 | 298                  | 30                    | 61.34          |
| P. Demelo-Rodriguez | 2020 | cohort          | Spain       | 156               | 16              | 140                 |                      |                       |                |
| Paolo Giorgio Rossi | 2020 | cohort          | Italy       | 1075              |                 |                     |                      |                       |                |
| Pingzheng Mo        | 2020 | cohort          | China       | 155               |                 |                     |                      |                       | 54             |
| Qiao Shi            | 2020 | cohort          | China       | 101               |                 |                     |                      | 101                   | 70             |
| Qingqing Chen       | 2020 | cohort          | China       | 145               | 1               | 144                 |                      |                       | 47.5           |
| Qingxian Cai (1)    | 2020 | cohort          | China       | 298               | 30              | 268                 |                      |                       | 47.3           |
| Qingxian Cai (2)    | 2020 | cohort          | China       | 383               | 35              | 348                 | 380                  | 3                     | 48.75          |
| Qijiang Ruan        | 2020 | cohort          | China       | 150               |                 |                     | 82                   | 68                    |                |
| Rajesh Bhayana      | 2020 | cross-sectional | USA         | 412               | 136             | 276                 |                      |                       | 57             |
| Ramin Sami          | 2020 | cohort          | Iran        | 450               | 39              | 451                 | 456                  | 34                    | 56.58          |
| Riccardo M. Incardi | 2020 | cohort          | Italy       | 99                | 12              | 87                  | 73                   | 26                    | 67             |
| Rohan Khera         | 2020 | cohort          | USA         | 7933              |                 |                     | 6803                 | 1130                  |                |
| Ru Liu              | 2020 | case-series     | China       | 41                | 1               |                     |                      |                       | 39.1           |
| Ruodong Li          | 2020 | cohort          | China       | 225               |                 |                     |                      |                       |                |
| Ruyuan He           | 2020 | cohort          | China       | 204               |                 |                     |                      |                       | 48.33          |
| Sally Richardson    | 2020 | case-series     | USA         | 5700              | 1281            | 4419                | 5147                 | 553                   | 63.33          |
| Saskia Middeldorp   | 2020 | cohort          | Netherlands | 198               | 75              | 123                 | 160                  | 38                    | 61             |
| Shaobo Shi (2)      | 2020 | cohort          | China       | 416               |                 |                     |                      |                       |                |
| Shashank Jain       | 2020 | cohort          | USA         | 459               | 190             | 269                 |                      |                       | 65.56          |
| Shen Xu             | 2020 | cohort          | China       | 355               |                 |                     |                      |                       |                |
| Shengmei Niu        | 2020 | cohort          | China       | 141               |                 |                     | 135                  | 6                     |                |
| Shuai Zhao          | 2020 | cohort          | China       | 37                |                 |                     |                      |                       | 41             |
| Shuke Nie           | 2020 | cohort          | China       | 97                |                 |                     |                      |                       | 43             |
| Sigurd F. Lax       | 2020 | case-series     | Austria     | 11                |                 |                     |                      |                       | 80.5           |
| Simone Piva         | 2020 | cohort          | Italy       | 33                | 33              |                     | 32                   | 1                     |                |
| Songping Cui        | 2020 | cohort          | China       | 81                | 81              |                     | 73                   | 8                     | 59.9           |
| Sun Chan            | 2020 | cohort          | China       | 150               |                 |                     |                      |                       |                |
| Susan Wan           | 2020 | case-series     | China       | 135               |                 |                     | 134                  | 1                     | 46             |
| T. Menter           | 2020 | cohort          | Switzerland | 21                |                 |                     |                      |                       | 76             |
| Tao Guo             | 2020 | cohort          | China       | 187               |                 |                     | 144                  | 43                    | 58.5           |
| Tiamin Xu           | 2020 | cohort          | China       | 51                |                 |                     |                      |                       |                |
| Toshiki Kuno        | 2020 | cohort          | USA         | 8438              |                 |                     |                      |                       | 57.66          |
| Vittorio Pavoni     | 2020 | cohort          | Italy       | 40                | 40              |                     | 35                   | 5                     | 61             |
| Wang Wenjun         | 2020 | cohort          | China       | 111               | 11              |                     |                      |                       | 59.66          |
| Wei Zhao            | 2020 | cohort          | China       | 101               |                 |                     |                      |                       |                |
| X. Wang             | 2020 | cohort          | China       | 1012              |                 |                     | 1012                 | 0                     | 49             |
| Xi Xu               | 2020 | cohort          | China       | 90                |                 |                     |                      |                       |                |
| Xiao Yu             | 2020 | cohort          | China       | 333               |                 |                     | 331                  | 2                     | 49.33          |
| Xiaofu Feng         | 2020 | cohort          | China       | 114               | 29              | 85                  | 105                  | 9                     | 63.96          |
| Xiaochen Li         | 2020 | cohort          | China       | 548               |                 |                     |                      |                       | 59             |
| Xiaoli Zhang        | 2020 | cohort          | China       | 645               |                 |                     |                      |                       | 45.33          |
| Xiao-Wen Xu         | 2020 | case-series     | China       | 62                |                 | 1                   |                      |                       | 43.66          |
| Xin-Ying Zhao       | 2020 | cohort          | China       | 91                |                 |                     | 89                   | 2                     |                |
| Yan Zhang           | 2020 | cohort          | China       | 258               |                 |                     |                      |                       | 63.33          |
| Yi Han              | 2020 | cohort          | China       | 47                |                 |                     |                      |                       | 60.97          |
| Yi Zhang            | 2020 | cohort          | China       | 34                | 34              |                     | 34                   | 0                     | 66.66          |
| Yingzhen Du         | 2020 | cohort          | China       | 85                |                 |                     |                      | 85                    | 65.8           |
| Yiwa Zhou           | 2020 | cohort          | China       | 366               |                 |                     |                      |                       | 41.93          |
| Yu Chengcheng       | 2020 | cohort          | China       | 91                |                 |                     |                      |                       | 48.3           |
| Yu Shi              | 2020 | cohort          | China       | 487               |                 |                     |                      |                       |                |
| Yuwei Liu           | 2020 | cohort          | China       | 245               |                 |                     | 212                  | 33                    | 54.02          |
| Zhang Yingtao       | 2020 | cohort          | China       | 1350              |                 |                     |                      |                       | 44.1           |
| Zhaowei Zhu         | 2020 | cohort          | China       | 12                |                 |                     |                      |                       | 54             |
| Zhe Zhu             | 2020 | cohort          | China       | 127               |                 |                     |                      |                       | 50.9           |
| Zhongliang Wang     | 2020 | cohort          | China       | 69                |                 |                     |                      |                       | 46.33          |
| Zhi Zhou            | 2020 | cohort          | China       | 254               |                 |                     |                      |                       | 50.33          |
| Zongqiao Yang       | 2020 | cohort          | China       | 273               |                 |                     | 273                  | 0                     | 49.33          |
| Zonghao Zhao        | 2020 | case-series     | China       | 75                |                 |                     |                      |                       | 45.33          |





| Study                   | Total_Male | Total_Female | ICU_Male | ICU_Female | Non ICU_Male | Non ICU_Female | Mortality_Male | Mortality_Female | Survival_Male |
|-------------------------|------------|--------------|----------|------------|--------------|----------------|----------------|------------------|---------------|
| Chaolin Huang           | 30         | 11           | 11       | 2          | 19           | 9              |                |                  |               |
| Chen Chen (1)           |            |              | 18       |            | 66           |                |                |                  |               |
| Chen Chen (2)           | 76         | 56           |          |            |              |                |                |                  | 67            |
| Christopher T. Rentsch  | 289        | 8            | 119      | 3          | 170          | 5              | 9              | 4                |               |
| Conversano Andrea       | 131        | 60           |          |            |              |                |                |                  |               |
| Corrado Lodigiani       |            |              |          |            |              |                |                |                  |               |
| Daniel Gaglianni        | 12         | 10           | 9        | 2          | 3            | 8              |                |                  |               |
| Dawei Wang (1)          | 75         | 63           | 22       | 14         | 53           | 49             |                |                  |               |
| Dawei Wang (2)          | 57         | 50           |          |            |              |                | 16             | 3                | 41            |
| E Saptev                | 1290       | 927          |          |            |              |                | 384            | 227              | 9096          |
| Fan Zhang               | 33         | 15           |          |            |              |                |                | 5                |               |
| Fei Zhou                | 119        | 72           |          |            |              |                | 38             | 16               | 81            |
| Filippo Lagi            | 55         | 29           |          |            |              |                |                |                  |               |
| GE Heng                 | 37         | 14           | 37       | 14         |              |                | 9              | 14               | 28            |
| Graziella Bonetti       | 96         | 49           |          |            |              |                |                |                  |               |
| Haiying Sun             | 133        | 111          |          |            |              |                |                |                  |               |
| He Xingwei              | 34         | 20           |          |            |              |                | 16             | 10               | 18            |
| Hua Fan                 | 49         | 24           | 49       | 24         |              |                | 32             | 15               | 17            |
| Jessica Ferguson        | 38         | 34           | 13       | 8          | 25           | 26             |                |                  |               |
| Jianguo Zhang           | 67         | 68           | 15       | 15         | 52           | 53             |                |                  |               |
| Jianlei Cao             | 53         | 49           | 12       | 6          | 41           | 43             |                |                  |               |
| Jixiang Zhang           | 255        | 286          |          |            |              |                |                |                  |               |
| Joseph E. Ebinger       | 135        | 79           | 57       | 20         | 78           | 59             |                |                  |               |
| Kun Wang (A)            | 140        | 156          |          |            |              |                |                | 8                | 129           |
| Kun Wang (B)            | 24         | 20           |          |            |              |                | 10             | 4                | 24            |
| Kunhua Li               | 44         | 39           | 15       | 10         | 29           | 29             |                |                  |               |
| Kyung Soo Hong          | 38         | 60           | 6        | 7          | 32           | 53             |                |                  |               |
| Lang Wang               | 166        | 173          |          |            |              |                | 39             | 26               | 127           |
| Lini Fu                 | 99         |              |          |            |              |                | 16             | 18               |               |
| Michael G Argenziano    | 511        | 339          | 158      | 78         | 353          | 261            |                |                  |               |
| Milo Cao                | 101        | 97           |          |            |              |                | 11             |                  |               |
| Mohamad Nikpouraghdam   | 1955       | 1009         |          |            |              |                | 167            | 72               | 1788          |
| Nicola Galbazzi         | 169        | 110          |          |            |              |                | 74             | 35               | 95            |
| Peng Yudong             | 59         | 53           | 9        | 7          | 44           | 52             |                |                  |               |
| Qilin Liu               | 172        | 168          |          |            |              |                | 17             | 13               | 155           |
| Qing Deng               | 57         | 55           |          |            |              |                |                |                  |               |
| Qingchun Yao            | 43         | 65           |          |            |              |                | 7              | 5                | 36            |
| Rahul Shekhar           | 23         | 27           | 15       | 19         | 8            | 8              |                |                  |               |
| Rong-Hui Du (1)         | 97         | 82           |          |            |              |                | 10             | 11               | 87            |
| Rong-Hui Du (2)         | 74         | 35           | 36       | 15         | 38           | 20             | 74             | 35               |               |
| Ruchong Chen            |            |              |          |            |              |                | 39             | 11               |               |
| SCOTT W. KETCHAM        | 13         |              |          |            | 7            |                |                |                  |               |
| Shaobo Shi (1)          | 322        | 349          |          |            |              |                | 35             | 27               | 287           |
| Shi Tai                 | 132        | 200          | 27       | 31         | 105          | 169            |                |                  |               |
| Tao Chen                | 171        | 103          |          |            |              |                | 83             | 30               | 88            |
| Tian Gu                 | 173        | 102          |          |            |              |                | 56             | 38               | 117           |
| Todd Levy               | 6511       | 4584         |          |            |              |                |                |                  |               |
| Wang Lang               | 88         | 104          |          |            |              |                | 23             | 10               | 65            |
| Wei-Jie Guan            |            |              |          |            |              |                |                |                  |               |
| Wentao Ni               | 101        | 75           |          |            |              |                |                |                  |               |
| Xian Zhou               | 60         | 50           |          |            |              |                |                |                  |               |
| Xiaobo Yang             | 35         | 17           |          |            |              |                | 21             | 11               | 14            |
| Xiaoqing Zou            | 67         | 87           | 67       | 87         |              |                |                |                  |               |
| Xu Chen                 | 145        | 146          | 27       | 23         | 118          | 123            | 20             | 32               | 47            |
| Yan Deng                | 124        | 101          |          |            |              |                | 73             | 36               | 51            |
| Yongli Zheng            | 51         | 48           | 19       | 13         | 32           | 35             |                |                  |               |
| Yusbin Liu              | 133        | 158          |          |            |              |                |                |                  |               |
| Yu-Ping Yang            | 56         | 37           |          |            |              |                |                |                  |               |
| Aiqi Xi                 | 12         | 6            |          |            |              |                |                |                  |               |
| Alberto Zangrillo       |            |              |          |            |              |                |                |                  |               |
| Alexander C. Raavi      | 34         |              |          |            |              |                |                |                  |               |
| Amaro Nunes Duarte-Neto | 5          | 5            |          |            |              |                | 5              | 5                |               |
| Anuradha Lala           | 1630       | 1106         |          |            |              |                |                |                  |               |
| Arthur Simone           | 91         | 33           |          |            |              |                |                |                  |               |
| Benjamin T. Bradley     | 5          | 7            |          |            |              |                |                |                  |               |
| Bicheng Zhang           | 54         | 28           |          |            |              |                | 54             | 28               |               |
| Bo XU                   | 103        | 84           |          |            |              |                | 17             | 11               | 86            |
| Bo Zhou                 | 17         | 26           |          |            |              |                |                |                  |               |
| Casas Rojo, José Manuel | 3655       | 2769         |          |            |              |                |                |                  |               |
| Chaomin Wu (1)          | 128        | 73           |          |            |              |                |                |                  |               |
| Chaomin Wu (2)          | 119        | 69           |          |            |              |                |                |                  |               |
| Christopher M Petrilli  | 1678       | 1063         |          |            |              |                |                |                  |               |
| Congliang Miao          | 32         | 30           |          |            |              |                |                |                  |               |
| David A. Kolin          | 378        | 291          |          |            |              |                |                |                  |               |
| Di Qi                   | 149        | 118          |          |            |              |                |                |                  |               |
| E.K.Leeong              | 2947       | 4808         |          |            |              |                | 37             | 29               | 2910          |
| Edward Itelman          | 105        | 57           |          |            |              |                |                |                  |               |
| Elsa Benetti            | 24         | 11           |          |            |              |                |                |                  |               |
| F. DIEGIG               | 80         | 81           |          |            |              |                |                |                  |               |
| F.A. Klok               | 139        | 45           | 139      | 45         |              |                |                |                  |               |
| Fan Yang                | 49         | 43           |          |            |              |                |                |                  |               |
| Fang Liu (1)            |            |              |          |            |              |                |                |                  |               |
| Fang Liu (2)            | 49         | 91           |          |            |              |                |                |                  |               |
| Farhaan S. Vahidy       | 325        | 429          |          |            |              |                |                |                  |               |
| Farhana Latif           | 22         | 6            |          |            |              |                |                |                  |               |
| Fatih Osturk            | 29         | 22           |          |            |              |                |                |                  |               |
| Fating Zhou             | 99         | 98           |          |            |              |                |                |                  |               |
| Fei Shao                | 90         | 46           |          |            |              |                |                |                  |               |
| Fengming Song           | 25         | 26           |          |            |              |                |                |                  |               |
| Francesca Brou          | 758        | 845          |          |            |              |                |                |                  |               |
| Franklin L. Wright      | 28         | 16           |          |            |              |                |                |                  |               |
| Frederick S. Buckner    | 53         | 52           |          |            |              |                |                |                  |               |
| Gabriel A Brat          |            |              |          |            |              |                |                |                  |               |
| Giacomo Grasselli       | 1304       | 287          | 1304     | 287        |              |                |                |                  |               |
| Gioel Gabrio Secco      | 24         | 7            |          |            |              |                |                |                  |               |
| Guang Chen              | 17         | 4            |          |            |              |                |                |                  |               |
| Guo-Qing Qian           | 37         | 54           |          |            |              |                |                |                  |               |
| Guoqin Zhang            | 108        | 113          |          |            |              |                |                |                  |               |
| Helen Fogarty           | 55         | 28           |          |            |              |                |                |                  |               |
| Helena Barrasa          | 27         | 21           | 27       | 21         |              |                |                |                  |               |
| Heshui Shi              | 42         | 39           |          |            |              |                |                |                  |               |
| Huan Huan               | 97         | 176          |          |            |              |                |                |                  |               |
| Huayan Xu               |            |              |          |            |              |                |                |                  |               |
| Hui Dai                 | 136        | 98           |          |            |              |                |                |                  |               |
| Hui Hui                 | 19         | 22           |          |            |              |                |                |                  |               |
| Ignasi Garcia-Oliva     | 11         | 10           |          |            |              |                |                |                  |               |
| J. Zhang                | 321        | 342          |          |            |              |                |                |                  |               |
| Jean-Luc Murk           | 67         | 33           |          |            |              |                | 15             | 10               | 306           |
| Jia-Fu Wei              | 54         | 47           |          |            |              |                |                |                  |               |

| Study               | Total_Male | Total_Female | ICU_Male | ICU_Female | Non ICU_Male | Non ICU_Female | Mortality_Male | Mortality_Female | Survival_Male |
|---------------------|------------|--------------|----------|------------|--------------|----------------|----------------|------------------|---------------|
| Jian Chen           |            |              |          |            |              |                |                |                  |               |
| Jian Wu             | 39         | 41           | 64       | 37         |              |                |                |                  |               |
| Jiangshan Lian (1)  | 243        | 222          |          |            |              |                |                |                  |               |
| Jiangshan Lian (2)  | 407        | 381          |          |            |              |                |                |                  |               |
| Jianhong Fu         | 45         | 30           |          |            |              |                |                |                  |               |
| Jiaofeng Huang      | 188        | 156          |          |            |              |                |                |                  |               |
| Jie Chen            | 452        | 635          |          |            |              |                |                |                  |               |
| Jing Yuan           | 42         | 52           |          |            |              |                |                |                  |               |
| Jinjin Zhang        | 71         | 69           |          |            |              |                |                |                  | 42            |
| Julie Helms         | 122        | 28           |          |            |              |                |                |                  |               |
| Jun Fei             |            |              |          |            |              |                |                |                  |               |
| Juan Zhang          | 46         | 65           |          |            |              |                |                |                  |               |
| K. Wang             | 58         | 56           |          |            |              |                |                |                  |               |
| Kajin Xu            | 66         | 47           |          |            |              |                | 2              | 0                | 64            |
| Kim Lindsay         | 1326       | 1165         |          |            |              |                |                |                  |               |
| Kui Liu             | 61         | 76           |          |            |              |                |                |                  |               |
| Lei Gao             | 24         | 30           |          |            |              |                |                |                  |               |
| Leonidas Palaodimos | 98         | 102          |          |            |              |                |                |                  |               |
| Li Yin              |            |              |          |            |              |                |                |                  |               |
| Li Zhang            | 74         | 69           |          |            |              |                |                |                  |               |
| Lijiao Zeng         | 162        | 176          |          |            |              |                |                |                  |               |
| Lijun Sun           | 31         | 24           |          |            |              |                | 0              | 0                | 31            |
| Ling Mao            | 87         | 127          |          |            |              |                |                |                  |               |
| Lu lin              | 45         | 50           |          |            |              |                |                |                  | 45            |
| Marco Vicenzi       | 29         | 11           |          |            |              |                |                |                  |               |
| Matt Arentz         | 11         | 10           |          |            |              |                |                |                  |               |
| Matthew J Cummings  | 171        | 86           |          |            |              |                |                |                  |               |
| Mingyue Li          | 34         | 49           |          |            |              |                |                |                  |               |
| Miriam Estebanez    | 152        | 104          |          |            |              |                |                |                  |               |
| Nan Hong            | 31         | 25           |          |            |              |                |                |                  |               |
| Nanshan Chen        | 67         | 32           |          |            |              |                |                |                  |               |
| Neo Poyladij        | 150        | 178          |          |            |              |                |                |                  |               |
| P. Demelo-Rodriguez | 102        | 54           |          |            | 102          | 54             |                |                  |               |
| Paolo Giorgi Rossi  | 657        | 418          |          |            |              |                |                |                  |               |
| Pingcheng Mo        | 86         | 69           |          |            |              |                |                |                  |               |
| Qiao Shi            | 60         | 41           |          |            |              |                |                |                  |               |
| Qingqiang Chen      | 79         | 66           |          |            |              |                |                |                  |               |
| Qingshan Cai (1)    | 145        | 153          |          |            |              |                |                |                  |               |
| Qingshan Cai (2)    | 183        | 200          |          |            |              |                |                |                  |               |
| Qirong Ruan         |            |              |          |            |              |                |                |                  |               |
| Rajesh Bhavana      | 241        | 171          | 85       | 51         |              |                |                |                  |               |
| Ramin Sami          | 299        | 191          | 19       | 20         | 155          | 121            |                |                  |               |
| Ricardo M. Incardi  | 80         | 19           |          |            |              |                |                |                  |               |
| Rohan Kherra        | 3601       | 4332         |          |            |              |                |                |                  |               |
| Ru Liu              | 17         | 24           |          |            |              |                |                |                  |               |
| Ruoqing Li          | 120        | 105          |          |            |              |                |                |                  |               |
| Ruyuan He           | 79         | 125          |          |            |              |                |                |                  |               |
| Safiya Richardson   | 3437       | 2263         |          |            |              |                |                |                  |               |
| Saskia Middeldorp   | 130        | 68           | 58       | 17         | 72           | 51             |                |                  |               |
| Shaobo Shi (2)      | 205        | 211          |          |            |              |                |                |                  |               |
| Shashank Jain       | 64         | 395          |          |            |              |                |                |                  |               |
| Shen Xu             | 193        | 162          |          |            |              |                |                |                  |               |
| Shengmei Niu        | 70         | 71           |          |            |              |                |                |                  |               |
| Shuai Zhao          | 23         | 14           |          |            |              |                |                |                  |               |
| Shuke Nie           | 34         | 63           |          |            |              |                |                |                  |               |
| Sigurd F. Lax       | 8          | 3            |          |            |              |                |                |                  |               |
| Simone Piva         | 30         | 3            | 30       | 3          |              |                |                |                  |               |
| Songqing Cui        | 37         | 44           | 37       | 44         |              |                |                |                  |               |
| Sun Chan            | 67         | 83           |          |            |              |                |                |                  |               |
| Susan Wan           | 72         | 63           |          |            |              |                |                |                  |               |
| T. Menter           | 17         | 4            |          |            |              |                |                |                  |               |
| Tao Guo             | 91         | 96           |          |            |              |                |                |                  |               |
| Tianm Xu            | 25         | 26           |          |            |              |                |                |                  |               |
| Toshiki Kuno        | 4544       | 3894         |          |            |              |                |                |                  |               |
| Vittorio Pavoni     | 24         | 16           | 24       | 16         |              |                |                |                  |               |
| Wang Wenjun         | 10         | 1            | 10       | 1          |              |                |                |                  |               |
| Wei Zhao            |            |              |          |            |              |                |                |                  |               |
| X. Wang             | 524        | 488          |          |            |              |                | 0              | 0                | 524           |
| Xi Xu               | 39         | 51           |          |            |              |                |                |                  |               |
| Xiao Yu             | 172        | 161          |          |            |              |                |                |                  |               |
| Xiaobo Feng         | 71         | 43           |          |            |              |                | 1              | 1                | 171           |
| Xiaochen Li         | 279        | 269          |          |            |              |                |                |                  |               |
| Xiaoli Zhang        | 328        | 317          |          |            |              |                |                |                  |               |
| Xiao-Wei Xu         | 35         | 27           |          |            |              |                |                |                  |               |
| Xin-Ying Zhao       | 49         | 42           |          |            |              |                |                |                  |               |
| Yan Zhang           | 138        | 120          |          |            |              |                |                |                  |               |
| Yi Han              | 26         | 21           |          |            |              |                |                |                  |               |
| Yi Zheng            | 23         | 11           | 23       | 11         |              |                | 0              | 0                | 23            |
| Yingzhen Du         | 62         | 23           |          |            |              |                | 62             | 23               |               |
| Yiwu Zhou           | 207        | 159          |          |            |              |                |                |                  |               |
| Yu Chengcheng       | 39         | 52           |          |            |              |                |                |                  |               |
| Yu Shi              | 259        | 228          |          |            |              |                |                |                  |               |
| Yuwwei Liu          | 114        | 131          |          |            |              |                |                |                  |               |
| Zhang Yingtao       |            |              |          |            |              |                |                |                  |               |
| Zhaowei Zhu         | 8          | 4            |          |            |              |                |                |                  |               |
| Zhe Zhu             | 45         | 82           |          |            |              |                |                |                  |               |
| Zhongliang Wang     | 32         | 37           |          |            |              |                |                |                  |               |
| Zili Zhou           |            |              |          |            |              |                |                |                  |               |
| Zongqiao Yang       | 134        | 139          |          |            |              |                | 0              | 0                | 134           |
| Zonghao Zhao        | 33         | 42           |          |            |              |                |                |                  |               |







| Study                   | Non ICU_Hypertension | Mortality_Hypertension | Survival_Hypertension | Total_Cardiovascular Disease | ICU_Cardiovascular Disease | Non ICU_Cardiovascular Disease |
|-------------------------|----------------------|------------------------|-----------------------|------------------------------|----------------------------|--------------------------------|
| Chaolin Huang           | 4                    |                        |                       | 6                            | 3                          | 3                              |
| Chen Chen (1)           | 35                   |                        |                       |                              |                            |                                |
| Chen Chen (2)           |                      | 10                     | 80                    |                              |                            |                                |
| Christopher T. Rentsch  | 133                  |                        |                       | 113                          | 48                         | 65                             |
| Conversano Andrea       |                      | 34                     | 62                    |                              |                            |                                |
| Corrado Lodigiani       | 156                  |                        |                       |                              |                            |                                |
| Daniel Gajani           |                      |                        |                       | 10                           | 5                          | 5                              |
| Dawei Wang (1)          | 22                   |                        |                       | 20                           | 9                          | 11                             |
| Dawei Wang (2)          |                      | 10                     | 16                    | 13                           |                            |                                |
| E Sapry                 |                      | 301                    | 563                   | 546                          |                            |                                |
| Fan Zhang               |                      | 12                     | 20                    |                              |                            |                                |
| Fei Zhou                |                      | 26                     | 32                    |                              |                            |                                |
| Filippo Lagi            | 26                   |                        |                       |                              |                            |                                |
| GE Heng                 |                      | 6                      | 16                    | 33                           | 33                         |                                |
| Graziella Bonetti       |                      |                        |                       | 71                           |                            |                                |
| Haiying Sun             |                      | 76                     | 62                    |                              |                            |                                |
| He Xingwei              |                      | 12                     | 12                    |                              |                            |                                |
| Hua Fan                 |                      | 21                     | 3                     |                              |                            |                                |
| Jessica Ferguson        | 15                   |                        |                       |                              |                            |                                |
| Jianguo Zhang           | 17                   |                        |                       | 4                            | 1                          | 3                              |
| Jianlei Cao             | 18                   |                        |                       | 5                            | 2                          | 3                              |
| Jiayang Zhang           |                      |                        |                       | 144                          |                            |                                |
| Joseph E. Ebinger       | 68                   |                        |                       |                              |                            |                                |
| Kun Wang (A)            |                      | 9                      | 33                    |                              |                            |                                |
| Kun Wang (B)            |                      | 4                      | 7                     |                              |                            |                                |
| Kunhua Li               | 3                    |                        |                       | 1                            | 1                          | 0                              |
| Kyung Soo Hong          | 25                   |                        |                       | 11                           | 0                          | 11                             |
| Lang Wang               |                      | 32                     | 106                   | 53                           |                            |                                |
| Liu Fu                  |                      | 22                     | 79                    | 16                           |                            |                                |
| Michael G Argenziano    | 367                  |                        |                       |                              |                            |                                |
| Min Cao                 | 36                   |                        |                       | 12                           |                            | 7                              |
| Mohamad Nikpourahdam    |                      | 8                      | 51                    | 37                           | 5                          |                                |
| Nicola Gaibazzi         |                      | 65                     | 92                    | 41                           |                            |                                |
| Peng Yudong             | 82                   |                        | 15                    | 77                           |                            |                                |
| Qibin Liu               |                      | 16                     | 68                    | 24                           |                            |                                |
| Qing Deng               |                      | 5                      | 31                    |                              |                            |                                |
| Qingchun Yao            |                      | 7                      | 9                     | 4                            |                            |                                |
| Rahul Shekhar           | 3                    |                        |                       |                              |                            |                                |
| Rong-Hui Du (1)         |                      | 13                     | 45                    |                              |                            |                                |
| Rong-Hui Du (2)         | 36                   |                        | 65                    |                              |                            |                                |
| Ruchong Chen            |                      | 28                     | 241                   |                              |                            |                                |
| SCOTT W. KETCHAM        | 5                    |                        |                       |                              |                            |                                |
| Shaobo Shi (1)          |                      | 37                     | 162                   |                              |                            |                                |
| Shi Tai                 | 21                   |                        |                       | 48                           | 23                         | 25                             |
| Tao Chen                |                      | 54                     | 39                    | 23                           |                            |                                |
| Tian Liu                |                      | 42                     | 67                    | 37                           |                            |                                |
| Todd J. Levy            |                      | 1517                   | 4005                  |                              |                            |                                |
| Wang Lang               |                      | 16                     | 44                    | 16                           |                            |                                |
| Weijie Guan             | 247                  |                        | 28                    | 241                          | 59                         |                                |
| Wentao Ni               |                      | 5                      | 31                    |                              |                            |                                |
| Xian Zhou               |                      | 7                      | 29                    | 10                           |                            |                                |
| Xiaobo Yang             |                      |                        |                       | 5                            |                            |                                |
| Xiaojing Zou            |                      | 21                     | 26                    |                              |                            |                                |
| Xu Chen                 | 20                   |                        |                       | 12                           | 5                          | 7                              |
| Yan Deng                |                      | 40                     | 18                    | 17                           |                            |                                |
| Yongli Zheng            |                      |                        |                       | 21                           | 17                         | 4                              |
| Yubbin Liu              |                      |                        |                       |                              |                            |                                |
| Yu-Peng Yang            |                      |                        |                       | 13                           |                            |                                |
| Aiqi Xi                 |                      |                        |                       |                              |                            |                                |
| Alberto Zangrillo       |                      |                        |                       |                              |                            |                                |
| Alexander C. Kazzi      |                      | 1135                   |                       | 396                          |                            |                                |
| Amaro Nunes Duarte-Neto |                      | 5                      |                       | 5                            |                            |                                |
| Anuradha Lala           |                      |                        |                       | 656                          |                            |                                |
| Arthur Simonon          |                      |                        |                       |                              |                            |                                |
| Benjamin T. Bradley     |                      |                        |                       |                              |                            |                                |
| Bicheng Zhang           |                      | 46                     |                       | 17                           |                            |                                |
| Bo XU                   |                      |                        |                       |                              |                            |                                |
| Bo Zhou                 |                      |                        |                       |                              |                            |                                |
| Casas-Rejo, José Manuel |                      |                        |                       |                              |                            |                                |
| Chaomin Wu (1)          |                      |                        |                       | 8                            |                            |                                |
| Chaomin Wu (2)          |                      |                        |                       |                              |                            |                                |
| Christopher M Petrilli  |                      |                        |                       |                              |                            |                                |
| Congliang Miao          |                      |                        |                       | 1                            |                            |                                |
| David A. Kolin          |                      |                        |                       | 58                           |                            |                                |
| Di Qi                   |                      |                        |                       |                              |                            |                                |
| E.K.Jeong               |                      | 30                     |                       |                              |                            |                                |
| Edward Heilman          |                      |                        |                       |                              |                            |                                |
| Elsa Bonetti            |                      |                        |                       |                              |                            |                                |
| F. ZHENG                |                      |                        |                       |                              |                            |                                |
| F.A. Klok               |                      |                        |                       |                              |                            |                                |
| Fan Yang                |                      |                        |                       | 16                           |                            |                                |
| Fang Liu (1)            |                      |                        |                       | 1                            |                            |                                |
| Fang Liu (2)            |                      |                        |                       | 35                           |                            |                                |
| Farhaan S. Vahidy       |                      |                        |                       |                              |                            |                                |
| Farhana Latif           |                      |                        |                       |                              |                            |                                |
| Fatih Ostrik            |                      |                        |                       |                              |                            |                                |
| Fating Zhou             |                      |                        |                       | 48                           |                            |                                |
| Fei Shao                |                      |                        |                       | 10                           |                            |                                |
| Fengxiang Song          |                      |                        |                       | 1                            |                            |                                |
| Francesca Bravi         |                      |                        |                       | 258                          |                            |                                |
| Franklin L. Wright      |                      |                        |                       |                              |                            |                                |
| Frederick S. Buckner    |                      |                        |                       |                              |                            |                                |
| Gabriel A Brat          |                      |                        |                       |                              |                            |                                |
| Giacomo Grasselli       |                      | 195                    | 314                   | 223                          | 223                        |                                |
| Gioel Gabrio Secco      |                      |                        |                       |                              |                            |                                |
| Guang Chen              |                      |                        |                       |                              |                            |                                |
| Guo-Qing Qian           |                      |                        |                       |                              |                            |                                |
| Guqin Zhang             |                      |                        |                       | 22                           |                            |                                |
| Helen Fogarty           |                      |                        |                       |                              |                            |                                |
| Helena Barrasa          |                      |                        |                       | 5                            | 5                          |                                |
| Heshui Shi              |                      |                        |                       | 8                            |                            |                                |
| Huan Han                |                      |                        |                       |                              |                            |                                |
| Huayun Xu               |                      |                        |                       | 6                            |                            |                                |
| Hui Dai                 |                      |                        |                       |                              |                            |                                |
| Hui Hui                 |                      |                        |                       |                              |                            |                                |
| Ignasi Garcia-Olive     |                      |                        |                       | 164                          |                            |                                |
| J. Zhang                |                      |                        |                       | 44                           |                            |                                |
| Jean-Luc Murk           |                      |                        |                       |                              | 4                          |                                |
| Jia-Fu Wei              | 39                   |                        |                       |                              |                            | 40                             |

| Study                | Non ICU_Hypertension | Mortality_Hypertension | Survival_Hypertension | Total_Cardiovascular Disease | ICU_Cardiovascular Disease | Non ICU_Cardiovascular Disease |
|----------------------|----------------------|------------------------|-----------------------|------------------------------|----------------------------|--------------------------------|
| Jian Chen            |                      |                        |                       |                              | 49                         |                                |
| Jian Wu              |                      |                        |                       |                              |                            |                                |
| Jiangshan Lian (1)   |                      |                        |                       | 3                            |                            |                                |
| Jiangshan Lian (2)   |                      |                        |                       | 11                           |                            |                                |
| Jianhong Fu          |                      |                        |                       |                              |                            |                                |
| Jiaofeng Huang       |                      |                        |                       | 9                            |                            |                                |
| Jie Chen             |                      |                        |                       |                              |                            |                                |
| Jing Yuan            |                      |                        | 9                     |                              |                            |                                |
| Jin-jin Zhang        |                      |                        |                       |                              |                            |                                |
| Julie Helms          |                      |                        |                       | 72                           |                            |                                |
| Jun Fei              |                      |                        |                       | 16                           |                            |                                |
| Juqi Zhang           |                      |                        |                       | 3                            |                            |                                |
| K. Wang              |                      |                        |                       | 7                            |                            |                                |
| Kaijin Xu            |                      |                        |                       | 7                            |                            |                                |
| Kim Lindsay          |                      |                        |                       |                              |                            |                                |
| Kui Liu              |                      |                        |                       | 10                           |                            |                                |
| Lei Gao              |                      |                        |                       |                              |                            |                                |
| Leonidas Palaiodimos |                      |                        |                       |                              |                            |                                |
| Li Yin               |                      |                        |                       | 2                            |                            |                                |
| Li Zhang             |                      |                        |                       |                              |                            |                                |
| Lijiao Zeng          |                      |                        |                       |                              |                            |                                |
| Lijun Sun            | 0                    |                        | 8                     | 1                            |                            |                                |
| Ling Mao             |                      |                        |                       |                              |                            |                                |
| Lu lin               | 0                    |                        | 16                    |                              |                            |                                |
| Marco Vicenzi        |                      |                        |                       |                              |                            |                                |
| Matt Krenz           |                      |                        |                       |                              |                            |                                |
| Matthew J Cummings   |                      |                        |                       |                              |                            |                                |
| Mingyue Li           |                      |                        |                       |                              |                            |                                |
| Miriam Estebanez     |                      |                        |                       | 57                           |                            |                                |
| Nian Hong            |                      |                        |                       |                              |                            |                                |
| Nanshan Chen         |                      |                        |                       |                              |                            |                                |
| Neo Poyiadji         |                      |                        |                       |                              |                            |                                |
| P. Demelo-Rodriguez  |                      |                        |                       |                              |                            |                                |
| Paolo Gissi Rossi    |                      |                        |                       |                              |                            |                                |
| Pingcheng Mo         |                      |                        |                       | 15                           |                            |                                |
| Qiao Shi             |                      | 59                     |                       |                              |                            |                                |
| Qingrong Chen        |                      |                        |                       |                              |                            |                                |
| Qingxian Cai (1)     |                      |                        |                       | 25                           |                            |                                |
| Qingxian Cai (2)     |                      |                        |                       | 35                           |                            |                                |
| Qiurong Ruan         |                      |                        |                       |                              |                            |                                |
| Rajesh Bhayana       |                      |                        |                       |                              |                            |                                |
| Ramesh Sami          |                      |                        |                       | 69                           |                            |                                |
| Riccardo M. Inciardi |                      |                        |                       |                              |                            |                                |
| Rohan Khera          |                      |                        |                       | 1744                         |                            |                                |
| Ru Liu               |                      |                        |                       |                              | 1                          |                                |
| Ruoqing Li           |                      |                        |                       |                              |                            |                                |
| Ruyuan He            |                      |                        |                       | 5                            |                            |                                |
| Safya Richardson     |                      |                        |                       |                              |                            |                                |
| Saskia Middeldorp    |                      |                        |                       |                              |                            |                                |
| Shaobo Shi (2)       |                      |                        |                       |                              |                            |                                |
| Shashank Jain        |                      |                        |                       |                              |                            |                                |
| Shen Xu              |                      |                        |                       |                              |                            |                                |
| Shengmei Niu         |                      |                        |                       |                              |                            |                                |
| Shuai Zhao           |                      |                        |                       |                              |                            |                                |
| Shuke Nie            |                      |                        |                       |                              |                            |                                |
| Sigurd F. Lax        |                      |                        |                       |                              |                            |                                |
| Simone Piva          |                      |                        |                       | 14                           | 14                         |                                |
| Songping Cui         |                      |                        |                       |                              |                            |                                |
| Sun Chan             |                      |                        |                       | 4                            |                            |                                |
| Suain Wan            |                      |                        |                       | 7                            |                            |                                |
| T. Mentzer           |                      |                        |                       | 15                           |                            |                                |
| Tao Guo              |                      |                        |                       |                              |                            |                                |
| Tianxi Xu            |                      |                        |                       | 5                            |                            |                                |
| Toshiaki Kuno        |                      |                        |                       |                              |                            |                                |
| Vittorio Pavoni      |                      |                        |                       | 12                           | 12                         |                                |
| Wang Wenjun          |                      |                        |                       |                              |                            |                                |
| Weiz Zhao            |                      |                        |                       |                              |                            |                                |
| X. Wang              | 0                    |                        | 46                    | 15                           |                            |                                |
| Xi Xu                |                      |                        |                       | 3                            |                            |                                |
| Xiao Yu              | 2                    |                        | 62                    | 24                           |                            |                                |
| Xiaobo Feng          |                      |                        |                       | 31                           |                            |                                |
| Xiaochen Li          |                      |                        |                       |                              |                            |                                |
| Xiaoli Zhang         |                      |                        |                       |                              |                            |                                |
| Xiao-Wen Xu          |                      |                        |                       |                              |                            |                                |
| Xin-Ying Zhao        |                      |                        |                       | 14                           |                            |                                |
| Yan Zhang            |                      |                        |                       | 39                           |                            |                                |
| Yi Han               |                      |                        |                       |                              |                            |                                |
| Yi Zheng             | 0                    |                        | 22                    | 4                            | 4                          |                                |
| Yingchen Du          | 32                   |                        |                       |                              |                            |                                |
| Yiyu Zhou            |                      |                        |                       | 9                            |                            |                                |
| Yu Chengcheng        |                      |                        |                       | 4                            |                            |                                |
| Yuzhi                |                      |                        |                       | 11                           |                            |                                |
| Yuwei Liu            |                      |                        |                       |                              |                            |                                |
| Zhang Yingtao        |                      |                        |                       |                              |                            |                                |
| Zhaowei Zhu          |                      |                        |                       | 2                            |                            |                                |
| Zhe Zhu              |                      |                        |                       | 6                            |                            |                                |
| Zhongliang Wang      |                      |                        |                       | 8                            |                            |                                |
| Zili Zhou            |                      |                        |                       |                              |                            |                                |
| Zongqiao Yang        | 0                    |                        | 40                    |                              |                            |                                |
| Zonghao Zhao         |                      |                        |                       |                              |                            |                                |

| Study                   | Mortality_Cardiovascular Disease | Survival_Cardiovascular Disease | Total_Cardiovascular and Cerebrovascular Disease | Total_Coronary Heart Disease | ICU_Coronary Heart Disease |
|-------------------------|----------------------------------|---------------------------------|--------------------------------------------------|------------------------------|----------------------------|
| Chaolin Huang           |                                  |                                 |                                                  |                              |                            |
| Chen Chen (1)           |                                  |                                 |                                                  |                              | 6                          |
| Chen Chen (2)           |                                  |                                 |                                                  | 31                           |                            |
| Christopher T. Rentsch  |                                  |                                 |                                                  |                              |                            |
| Conversano Andrea       |                                  |                                 |                                                  | 28                           |                            |
| Corrado Lodigiani       |                                  |                                 |                                                  | 54                           | 7                          |
| Daniel Gagannis         |                                  |                                 |                                                  |                              |                            |
| Dawei Wang (1)          |                                  |                                 |                                                  |                              |                            |
| Dawei Wang (2)          | 7                                | 6                               |                                                  |                              |                            |
| E Sapry                 | 215                              | 331                             |                                                  |                              |                            |
| Fan Zhang               |                                  |                                 |                                                  | 13                           |                            |
| Fei Zhou                |                                  |                                 |                                                  | 15                           |                            |
| Filippo Lagi            |                                  |                                 |                                                  | 12                           | 5                          |
| GE Heng                 | 6                                | 27                              |                                                  | 12                           | 12                         |
| Grazella Bonetti        | 38                               | 33                              |                                                  |                              |                            |
| Haiying Sun             |                                  |                                 |                                                  | 35                           |                            |
| He Jengwei              |                                  |                                 | 7                                                | 8                            |                            |
| Hua Fan                 |                                  |                                 |                                                  |                              |                            |
| Jessica Ferguson        |                                  |                                 |                                                  | 7                            | 2                          |
| Jianguo Zhang           |                                  |                                 |                                                  |                              |                            |
| Jianlei Cao             |                                  |                                 |                                                  |                              |                            |
| Jixiang Zhang           | 32                               | 112                             |                                                  | 41                           |                            |
| Joseph E. Ebinger       |                                  |                                 |                                                  |                              |                            |
| Kun Wang (A)            |                                  |                                 |                                                  | 10                           |                            |
| Kun Wang (B)            |                                  |                                 |                                                  | 3                            |                            |
| Kunhua Li               |                                  |                                 |                                                  |                              |                            |
| Kyung Soo Hong          |                                  |                                 |                                                  |                              |                            |
| Lang Wang               | 21                               | 32                              |                                                  |                              |                            |
| Lih Fu                  | 2                                | 14                              |                                                  |                              |                            |
| Michael G Argenziano    |                                  |                                 |                                                  | 115                          | 29                         |
| Min Cao                 |                                  |                                 |                                                  |                              |                            |
| Mohamad Nikpouraghdam   | 4                                | 33                              |                                                  |                              |                            |
| Nicola Gaibazzi         | 26                               | 15                              |                                                  |                              |                            |
| Peng Yudong             |                                  |                                 |                                                  | 62                           | 10                         |
| Qibin Liu               | 5                                | 19                              |                                                  |                              |                            |
| Qing Deng               |                                  |                                 |                                                  | 15                           |                            |
| Qingchun Yao            | 2                                | 2                               |                                                  |                              |                            |
| Rahul Shekhar           |                                  |                                 |                                                  | 3                            |                            |
| Rong-Hui Du (1)         |                                  |                                 | 29                                               |                              |                            |
| Rong-Hui Du (2)         |                                  |                                 | 37                                               |                              |                            |
| Ruchong Chen            |                                  |                                 |                                                  | 59                           |                            |
| SCOTT W. KETCHAM        |                                  |                                 |                                                  | 6                            | 4                          |
| Shaobo Shi (1)          |                                  |                                 |                                                  | 60                           |                            |
| Shi Tai                 |                                  |                                 |                                                  | 11                           | 10                         |
| Tao Chen                | 16                               | 7                               |                                                  |                              |                            |
| Tan Du                  |                                  |                                 |                                                  | 40                           |                            |
| Todd J. Levy            |                                  |                                 |                                                  | 1042                         |                            |
| Wang Lang               | 5                                | 11                              |                                                  |                              |                            |
| Weijie Guan             |                                  |                                 |                                                  |                              |                            |
| Wentao Ni               |                                  |                                 |                                                  | 25                           |                            |
| Xian Zhou               |                                  |                                 |                                                  |                              |                            |
| Xiaobo Yang             |                                  | 2                               |                                                  |                              |                            |
| Xiaojing Zou            |                                  |                                 |                                                  | 23                           | 23                         |
| Xu Chen                 |                                  |                                 |                                                  |                              |                            |
| Yan Deng                | 13                               | 4                               |                                                  |                              |                            |
| Yongli Zheng            |                                  |                                 |                                                  |                              |                            |
| Yubinn Liu              |                                  |                                 |                                                  | 12                           |                            |
| Yu-Ping Yang            |                                  |                                 |                                                  |                              |                            |
| Aiqi Xi                 |                                  |                                 |                                                  |                              |                            |
| Alberto Zangrillo       |                                  |                                 |                                                  |                              |                            |
| Alexander C. Kazazi     | 396                              |                                 |                                                  |                              |                            |
| Amaro Nunes Duarte-Neto | 5                                |                                 |                                                  |                              |                            |
| Anuradha Lala           |                                  |                                 |                                                  | 453                          |                            |
| Arthur Simone           |                                  |                                 |                                                  |                              |                            |
| Benjamin T. Bradley     |                                  |                                 |                                                  | 3                            |                            |
| Bicheng Zhang           |                                  |                                 |                                                  |                              |                            |
| Bo XU                   |                                  |                                 | 19                                               |                              |                            |
| Bo Zhou                 |                                  |                                 |                                                  |                              |                            |
| Casas Rojo, José Manuel |                                  |                                 |                                                  |                              |                            |
| Chaomin Wu (1)          |                                  |                                 |                                                  |                              |                            |
| Chaomin Wu (2)          |                                  |                                 |                                                  |                              |                            |
| Christopher M Petrilli  |                                  |                                 |                                                  | 602                          |                            |
| Congliang Miao          |                                  |                                 |                                                  |                              |                            |
| David A. Kolin          |                                  |                                 |                                                  |                              |                            |
| Di Qi                   |                                  |                                 | 13                                               |                              |                            |
| E.K.Jeong               | 10                               |                                 |                                                  |                              |                            |
| Edward Itelman          |                                  |                                 |                                                  | 12                           |                            |
| Eliu Benetti            |                                  |                                 |                                                  |                              |                            |
| F.ZHENG                 |                                  |                                 |                                                  | 4                            |                            |
| F.A. Klok               |                                  |                                 |                                                  |                              |                            |
| Fan Yang                |                                  |                                 |                                                  |                              |                            |
| Fang Liu (1)            |                                  |                                 |                                                  |                              |                            |
| Fang Liu (2)            |                                  |                                 |                                                  |                              |                            |
| Farhaan S. Vahidy       |                                  |                                 |                                                  |                              |                            |
| Farhana Latif           |                                  |                                 |                                                  |                              |                            |
| Faith Octorik           |                                  |                                 |                                                  |                              |                            |
| Fating Zhou             |                                  |                                 |                                                  |                              |                            |
| Fei Shao                |                                  |                                 |                                                  | 15                           |                            |
| Fengqiang Song          |                                  |                                 |                                                  |                              |                            |
| Francesca Bovi          |                                  |                                 |                                                  |                              |                            |
| Franklin L. Wright      |                                  |                                 |                                                  |                              |                            |
| Frederick S. Buckner    |                                  |                                 | 40                                               |                              |                            |
| Gabriel A Brat          |                                  |                                 |                                                  |                              |                            |
| Giacomo Grasselli       |                                  |                                 |                                                  |                              |                            |
| Gioel Gabrio Secco      |                                  |                                 |                                                  |                              |                            |
| Guang Chen              |                                  |                                 |                                                  |                              |                            |
| Guo-Qing Qian           |                                  |                                 | 3                                                |                              |                            |
| Guoqin Zhang            |                                  |                                 |                                                  |                              |                            |
| Helen Fogarty           |                                  |                                 |                                                  |                              |                            |
| Helena Barrasa          |                                  |                                 |                                                  |                              |                            |
| Heshui Shi              |                                  |                                 |                                                  |                              |                            |
| Huan Han                |                                  |                                 |                                                  |                              |                            |
| Huayan Xu               |                                  |                                 |                                                  |                              |                            |
| Hui Dai                 |                                  |                                 |                                                  |                              |                            |
| Hui Hui                 |                                  |                                 |                                                  | 3                            |                            |
| Ignasi Garcia-Olive     |                                  |                                 |                                                  |                              |                            |
| J. Zhang                | 16                               | 148                             |                                                  |                              |                            |
| Jean-Luc Murk           |                                  |                                 |                                                  |                              |                            |
| Jia-Fu Wei              |                                  |                                 |                                                  | 5                            |                            |

| Study                | Mortality_Cardiovascular Disease | Survival_Cardiovascular Disease | Total_Cardiovascular and Cerebrovascular Disease | Total_Coronary Heart Disease | ICU_Coronary Heart Disease |
|----------------------|----------------------------------|---------------------------------|--------------------------------------------------|------------------------------|----------------------------|
| Jian Chen            |                                  |                                 |                                                  |                              |                            |
| Jian Wu              |                                  |                                 | 25                                               |                              |                            |
| Jiangshan Lian (1)   |                                  |                                 |                                                  |                              |                            |
| Jiangshan Lian (2)   |                                  |                                 |                                                  |                              |                            |
| Jianhong Fu          |                                  |                                 |                                                  |                              |                            |
| Jiaofeng Huang       |                                  |                                 |                                                  | 18                           |                            |
| Jie Chen             |                                  |                                 |                                                  |                              |                            |
| Jing Yuan            |                                  |                                 |                                                  | 6                            |                            |
| Jin-jin Zhang        |                                  |                                 |                                                  | 7                            |                            |
| Julie Helms          |                                  |                                 |                                                  |                              |                            |
| Jun Fei              |                                  |                                 |                                                  |                              |                            |
| Jun Zhang            |                                  |                                 |                                                  |                              |                            |
| K. Wang              |                                  |                                 |                                                  | 6                            |                            |
| Kajin Xu             |                                  |                                 |                                                  |                              |                            |
| Kim Lindsay          |                                  |                                 |                                                  |                              |                            |
| Kui Liu              |                                  |                                 |                                                  |                              |                            |
| Lei Gao              |                                  |                                 |                                                  | 9                            |                            |
| Leonidas Palaiodimos |                                  |                                 |                                                  | 33                           |                            |
| Li Yin               |                                  |                                 |                                                  |                              |                            |
| Lizhang              |                                  |                                 |                                                  | 17                           |                            |
| Lijiao Zeng          |                                  |                                 | 59                                               |                              |                            |
| Lijun Sun            | 0                                | 1                               |                                                  |                              |                            |
| Ling Mao             |                                  |                                 | 15                                               |                              |                            |
| Lu lin               |                                  |                                 | 4                                                |                              |                            |
| Marco Vicenzi        |                                  |                                 |                                                  |                              |                            |
| Matt Arenz           |                                  |                                 |                                                  |                              |                            |
| Matthew J Cummings   |                                  |                                 |                                                  |                              |                            |
| Mingyue Li           |                                  |                                 |                                                  | 5                            |                            |
| Miriam Estébanez     |                                  |                                 |                                                  |                              |                            |
| Nian Hong            |                                  |                                 |                                                  |                              |                            |
| Nanshan Chen         |                                  |                                 | 40                                               |                              |                            |
| Neo Poyiadji         |                                  |                                 |                                                  |                              |                            |
| P. Dernelo-Rodriguez |                                  |                                 |                                                  |                              |                            |
| Pablo Gorski Kessi   |                                  |                                 |                                                  |                              |                            |
| Pingcheng Mo         |                                  |                                 |                                                  |                              |                            |
| Qiao Shi             | 24                               |                                 |                                                  |                              |                            |
| Qinggang Chen        |                                  |                                 |                                                  |                              |                            |
| Qingxian Cai (1)     |                                  |                                 |                                                  |                              |                            |
| Qingxian Cai (2)     |                                  |                                 |                                                  |                              |                            |
| Qiorong Ruan         |                                  |                                 |                                                  |                              |                            |
| Rajesh Bhayana       |                                  |                                 |                                                  |                              |                            |
| Ramin Sami           |                                  |                                 |                                                  |                              |                            |
| Riccardo M. Incardi  |                                  |                                 |                                                  | 16                           |                            |
| Rohan Khera          |                                  |                                 |                                                  | 1                            |                            |
| Ru Liu               |                                  |                                 |                                                  |                              |                            |
| Ruoqing Li           |                                  |                                 |                                                  |                              |                            |
| Ruyuan He            |                                  |                                 |                                                  |                              |                            |
| Safya Richardson     |                                  |                                 |                                                  | 595                          |                            |
| Saskia Middeldorp    |                                  |                                 |                                                  |                              |                            |
| Shaobo Shi (2)       |                                  |                                 |                                                  | 44                           |                            |
| Shashank Jain        |                                  |                                 |                                                  |                              |                            |
| Shen Xu              |                                  |                                 |                                                  |                              |                            |
| Shengmei Niu         |                                  |                                 |                                                  | 8                            |                            |
| Shuai Zhao           |                                  |                                 |                                                  |                              |                            |
| Shuke Nie            |                                  |                                 |                                                  | 2                            |                            |
| Sigurd F. Lax        |                                  |                                 |                                                  | 3                            |                            |
| Simone Piva          |                                  |                                 |                                                  |                              |                            |
| Songqing Cui         |                                  |                                 |                                                  | 10                           | 10                         |
| Sun Chan             |                                  |                                 |                                                  |                              |                            |
| Suzon Wan            |                                  |                                 |                                                  |                              |                            |
| T. Menter            |                                  |                                 |                                                  |                              |                            |
| Tao Guo              |                                  |                                 |                                                  | 21                           |                            |
| Tammi Xu             |                                  |                                 |                                                  |                              |                            |
| Toshiki Kano         |                                  |                                 |                                                  | 723                          |                            |
| Vittorio Pavoni      |                                  |                                 |                                                  |                              |                            |
| Wang Wenjun          |                                  |                                 | 5                                                |                              | 3                          |
| Wei Zhao             |                                  |                                 | 16                                               | 3                            |                            |
| X. Wang              | 0                                | 15                              |                                                  |                              |                            |
| Xi Xu                |                                  |                                 |                                                  |                              |                            |
| Xiao Yu              | 1                                | 23                              |                                                  |                              |                            |
| Xiaobo Feng          |                                  |                                 |                                                  |                              |                            |
| Xiaochen Li          |                                  |                                 |                                                  | 34                           |                            |
| Xiaoli Zhang         |                                  |                                 |                                                  | 5                            |                            |
| Xiao-Xue Xu          |                                  |                                 |                                                  |                              |                            |
| Xin-Ying Zhao        |                                  |                                 |                                                  |                              |                            |
| Yan Zhang            |                                  |                                 |                                                  |                              |                            |
| Yi Han               |                                  |                                 |                                                  | 5                            |                            |
| Yi Zhang             | 0                                | 4                               |                                                  |                              |                            |
| Yingchen Du          |                                  |                                 |                                                  | 10                           |                            |
| Yuwu Zhou            |                                  |                                 |                                                  |                              |                            |
| Yu Chengcheng        |                                  |                                 |                                                  |                              |                            |
| Yuzhi                |                                  |                                 |                                                  |                              |                            |
| Yuwel Liu            |                                  |                                 |                                                  | 18                           |                            |
| Zhang Yingtao        |                                  |                                 | 48                                               |                              |                            |
| Zhaowei Zhu          |                                  |                                 |                                                  |                              |                            |
| Zhe Zhu              |                                  |                                 |                                                  |                              |                            |
| Zhongliang Wang      |                                  |                                 |                                                  |                              |                            |
| Zili Zhou            |                                  |                                 |                                                  | 17                           |                            |
| Zongqiao Yang        |                                  |                                 |                                                  |                              |                            |
| Zonghao Zhao         |                                  |                                 | 16                                               |                              |                            |

| Study                    | Non ICU_Coronary Heart Disease | Mortality_Coronary Heart Disease | Survival_Coronary Heart Disease | Total_Myocardial Damage | Total_Heart Palpitation | Total_Arrhythmia |
|--------------------------|--------------------------------|----------------------------------|---------------------------------|-------------------------|-------------------------|------------------|
| Chaolin Huang            |                                |                                  |                                 |                         |                         |                  |
| Chen Chen (1)            | 3                              |                                  |                                 |                         |                         |                  |
| Chen Chen (2)            |                                | 7                                | 24                              |                         |                         |                  |
| Christopher T. Rentsch   |                                |                                  |                                 |                         |                         |                  |
| Conversano Andrea        |                                | 9                                | 19                              |                         |                         |                  |
| Corrado Lodigiani        | 47                             |                                  |                                 |                         |                         | 23               |
| Daniel Gaglianni         |                                |                                  |                                 |                         |                         |                  |
| Dawei Wang (1)           |                                |                                  |                                 |                         |                         |                  |
| Dawei Wang (2)           |                                |                                  |                                 |                         |                         |                  |
| E Sapay                  |                                |                                  |                                 |                         |                         |                  |
| Fan Zhang                |                                | 4                                | 9                               |                         |                         | 7                |
| Fei Zhou                 |                                | 13                               | 2                               |                         |                         |                  |
| Filippo Lagi             | 7                              |                                  |                                 |                         |                         |                  |
| GE Heng                  |                                | 2                                | 10                              |                         |                         |                  |
| Graziella Bonetti        |                                |                                  |                                 |                         |                         |                  |
| Haiying Sun              |                                | 20                               | 15                              |                         |                         |                  |
| He Xingwei               |                                | 5                                | 3                               | 24                      |                         |                  |
| Hua Fan                  |                                |                                  |                                 |                         |                         |                  |
| Jessica Ferguson         | 5                              |                                  |                                 |                         |                         | 6                |
| Jianguo Zhang            |                                |                                  |                                 |                         |                         |                  |
| Jianlei Cao              |                                |                                  |                                 |                         |                         | 18               |
| Jixiang Zhang            |                                |                                  |                                 |                         |                         |                  |
| Joseph E. Ebinger        |                                |                                  |                                 |                         |                         |                  |
| Kun Wang (A)             |                                | 5                                | 5                               |                         |                         |                  |
| Kun Wang (B)             |                                | 3                                | 9                               |                         |                         |                  |
| Kunhua Li                |                                |                                  |                                 |                         |                         |                  |
| Kyung Soo Hong           |                                |                                  |                                 |                         |                         |                  |
| Lang Wang                |                                |                                  |                                 |                         |                         | 35               |
| Lili Fu                  |                                |                                  |                                 |                         |                         |                  |
| Michael G Argenziano     | 86                             |                                  |                                 |                         |                         |                  |
| Min Cao                  |                                |                                  |                                 |                         |                         |                  |
| Mohamad Nikpouraghdam    |                                |                                  |                                 |                         |                         |                  |
| Nicola Galbazzi          |                                |                                  |                                 |                         |                         |                  |
| Peng Yudong              | 52                             | 15                               | 47                              |                         |                         |                  |
| Qibin Liu                |                                |                                  |                                 |                         |                         |                  |
| Qing Deng                |                                | 4                                | 11                              |                         |                         |                  |
| Qingchun Yao             |                                |                                  |                                 |                         |                         |                  |
| Rahul Shekhar            |                                |                                  |                                 |                         |                         |                  |
| Rong-Hui Du (1)          |                                |                                  |                                 |                         |                         |                  |
| Rong-Hui Du (2)          |                                |                                  |                                 |                         |                         |                  |
| Ruchong Chen             |                                | 8                                | 51                              |                         |                         |                  |
| SCOTT W. KETCHAM         | 2                              |                                  |                                 |                         |                         |                  |
| Shaobo Shi (1)           |                                | 21                               | 39                              |                         |                         |                  |
| Shi Tai                  | 1                              |                                  |                                 |                         |                         |                  |
| Tao Chen                 |                                |                                  |                                 |                         |                         |                  |
| Tian Gu                  |                                | 25                               | 15                              |                         |                         |                  |
| Todd L Levy              |                                | 378                              | 664                             |                         |                         |                  |
| Wang Lang                |                                |                                  |                                 |                         |                         |                  |
| Weijie Guan              |                                |                                  |                                 |                         |                         |                  |
| Wentao Ni                |                                |                                  |                                 |                         |                         |                  |
| Xian Zhou                |                                |                                  |                                 |                         |                         |                  |
| Xiaobo Yang              |                                | 3                                |                                 |                         |                         |                  |
| Xiaojing Zou             |                                | 18                               | 5                               |                         |                         |                  |
| Xu Chen                  |                                |                                  |                                 |                         |                         |                  |
| Yan Deng                 |                                |                                  |                                 |                         | 24                      |                  |
| Yongli Zheng             |                                |                                  |                                 |                         |                         |                  |
| Yeubin Liu               |                                |                                  |                                 |                         | 3                       | 2                |
| Yi-Ping Yang             |                                |                                  |                                 |                         |                         |                  |
| Yiqi Xi                  |                                |                                  |                                 |                         |                         |                  |
| Alberto Zangrillo        |                                |                                  |                                 |                         |                         | 15               |
| Alexander C. Razavi      |                                |                                  |                                 |                         |                         |                  |
| Amaro Nunes Duarte-Neto  |                                |                                  |                                 |                         |                         |                  |
| Anuradha Lala            |                                |                                  |                                 |                         |                         |                  |
| Arthur Simonne           |                                |                                  |                                 |                         |                         |                  |
| Benjamin T. Bradley      |                                |                                  |                                 |                         |                         |                  |
| Bicheng Zhang            |                                |                                  |                                 |                         |                         |                  |
| Bo Xu                    |                                |                                  |                                 |                         |                         |                  |
| Bo Zhou                  |                                |                                  |                                 |                         |                         |                  |
| Carlos Rojo, José Manuel |                                |                                  |                                 |                         |                         |                  |
| Chaomin Wu (1)           |                                |                                  |                                 |                         |                         |                  |
| Chaomin Wu (2)           |                                |                                  |                                 |                         |                         |                  |
| Christopher M Petrilli   |                                |                                  |                                 |                         |                         |                  |
| Congliang Miao           |                                |                                  |                                 |                         |                         |                  |
| David A. Kolin           |                                |                                  |                                 |                         |                         |                  |
| Di Qi                    |                                |                                  |                                 |                         |                         |                  |
| E.K.Jeong                |                                |                                  |                                 |                         |                         |                  |
| Edward Itelman           |                                |                                  |                                 |                         |                         |                  |
| Eliisa Benetti           |                                |                                  |                                 |                         |                         | 4                |
| F.ZHENG                  |                                |                                  |                                 |                         |                         |                  |
| F.A. Klok                |                                |                                  |                                 |                         |                         |                  |
| Fan Yang                 |                                |                                  |                                 |                         |                         |                  |
| Fang Liu (1)             |                                |                                  |                                 |                         |                         |                  |
| Fang Liu (2)             |                                |                                  |                                 |                         |                         |                  |
| Farhaan S. Vahidy        |                                |                                  |                                 |                         |                         |                  |
| Farhana Latif            |                                |                                  |                                 |                         |                         |                  |
| Fatih Osturk             |                                |                                  |                                 |                         |                         |                  |
| Fating Zhou              |                                |                                  |                                 | 14                      |                         |                  |
| Fei Shao                 |                                |                                  |                                 |                         |                         |                  |
| Fengqing Song            |                                |                                  |                                 |                         |                         |                  |
| Francesco Bravi          |                                |                                  |                                 |                         |                         |                  |
| Franklin L. Wright       |                                |                                  |                                 |                         |                         | 3                |
| Frederick S. Buckner     |                                |                                  |                                 |                         |                         |                  |
| Gabriel A Brat           |                                |                                  |                                 |                         |                         |                  |
| Giacomo Grasselli        |                                |                                  |                                 |                         |                         |                  |
| Gioel Gabrio Secco       |                                |                                  |                                 |                         |                         |                  |
| Guang Chen               |                                |                                  |                                 |                         |                         |                  |
| Guo-Qing Qian            |                                |                                  |                                 |                         |                         |                  |
| Guqin Zhang              |                                |                                  |                                 |                         |                         | 24               |
| Helen Fogarty            |                                |                                  |                                 |                         |                         |                  |
| Helena Barrasa           |                                |                                  |                                 |                         |                         |                  |
| Heshui Shi               |                                |                                  |                                 |                         |                         |                  |
| Huan Han                 |                                |                                  |                                 |                         |                         |                  |
| Huayan Xu                |                                |                                  |                                 |                         |                         | 4                |
| Hui Dai                  |                                |                                  |                                 |                         |                         |                  |
| Hui Hui                  |                                |                                  |                                 |                         |                         |                  |
| Ignas Garcia-Oliva       |                                |                                  |                                 |                         |                         |                  |
| J. Zhang                 |                                |                                  |                                 |                         |                         |                  |
| Jean-Luc Murk            |                                |                                  |                                 |                         |                         |                  |
| Jia-Fu Wei               |                                |                                  |                                 |                         |                         |                  |

| Study                | Non ICU_Coronary Heart Disease | Mortality_Coronary Heart Disease | Survival_Coronary Heart Disease | Total_Myocardial Damage | Total_Heart Palpitation | Total_Arrythmia |
|----------------------|--------------------------------|----------------------------------|---------------------------------|-------------------------|-------------------------|-----------------|
| Jian Chen            |                                |                                  |                                 |                         |                         |                 |
| Jian Wu              |                                |                                  |                                 |                         |                         |                 |
| Jiangshan Lian (1)   |                                |                                  |                                 |                         |                         |                 |
| Jiangshan Lian (2)   |                                |                                  |                                 |                         |                         |                 |
| Jianhong Fu          |                                |                                  |                                 |                         |                         |                 |
| Jiaofeng Huang       |                                |                                  |                                 |                         |                         |                 |
| Jie Chen             |                                |                                  |                                 |                         |                         |                 |
| Jing Yuan            |                                |                                  | 6                               |                         |                         |                 |
| Jinjin Zhang         |                                |                                  |                                 |                         |                         | 5               |
| Julie Helms          |                                |                                  |                                 |                         |                         |                 |
| Jun Fei              |                                |                                  |                                 |                         |                         |                 |
| Jun Zhang            |                                |                                  |                                 |                         |                         |                 |
| K. Wang              |                                |                                  |                                 |                         |                         |                 |
| Kajjin Xu            |                                |                                  |                                 |                         |                         |                 |
| Kim Lindsay          |                                |                                  |                                 |                         |                         |                 |
| Kui Liu              |                                |                                  |                                 |                         | 10                      |                 |
| Lei Gao              |                                |                                  |                                 |                         |                         |                 |
| Leonidas Palaodimos  |                                |                                  |                                 |                         |                         |                 |
| Li Lin               |                                |                                  |                                 |                         |                         |                 |
| Li Zhang             |                                |                                  |                                 |                         |                         |                 |
| Lijiao Zeng          |                                |                                  |                                 |                         |                         |                 |
| Lijun Sun            |                                |                                  |                                 |                         |                         |                 |
| Ling Miao            |                                |                                  |                                 |                         |                         |                 |
| Lu lin               |                                |                                  |                                 |                         |                         |                 |
| Marco Vicenzi        |                                |                                  |                                 |                         |                         |                 |
| Matt Arentz          |                                |                                  |                                 |                         |                         |                 |
| Matthew J Cummings   |                                |                                  |                                 |                         |                         |                 |
| Mingyue Li           |                                |                                  |                                 |                         |                         |                 |
| Miriam Estébanez     |                                |                                  |                                 |                         |                         |                 |
| Nani Wang            |                                |                                  |                                 |                         |                         |                 |
| Nanshan Chen         |                                |                                  |                                 |                         |                         |                 |
| Neo Poyiadji         |                                |                                  |                                 |                         |                         |                 |
| P. Demelo-Rodriguez  |                                |                                  |                                 |                         |                         |                 |
| Paolo Giordano Rossi |                                |                                  |                                 |                         |                         | 123             |
| Pingzheng Mo         |                                |                                  |                                 |                         |                         |                 |
| Qiao Shi             |                                |                                  |                                 |                         |                         |                 |
| Qingqing Chen        |                                |                                  |                                 |                         |                         |                 |
| Qingshan Cai (1)     |                                |                                  |                                 |                         |                         |                 |
| Qingshan Cai (2)     |                                |                                  |                                 |                         |                         |                 |
| Qunrong Ruan         |                                |                                  |                                 |                         |                         |                 |
| Rajesh Bhatnara      |                                |                                  |                                 |                         |                         |                 |
| Ramin Sami           |                                |                                  |                                 |                         |                         |                 |
| Riccardo M. Inciardi |                                |                                  |                                 |                         |                         |                 |
| Rohan Kherra         |                                |                                  |                                 |                         |                         |                 |
| Rui Liu              |                                |                                  |                                 |                         |                         | 3               |
| Ruozheng Li          |                                |                                  |                                 |                         |                         |                 |
| Ruyuan He            |                                |                                  |                                 |                         |                         |                 |
| Safiya Richardson    |                                |                                  |                                 |                         |                         |                 |
| Saskia Middeldorp    |                                |                                  |                                 |                         |                         |                 |
| Shaobo Shi (2)       |                                |                                  |                                 |                         |                         |                 |
| Shashank Jain        |                                |                                  |                                 |                         |                         |                 |
| Shen Xu              |                                |                                  |                                 |                         |                         |                 |
| Shengmei Niu         |                                |                                  |                                 |                         |                         |                 |
| Shuai Zhao           |                                |                                  |                                 |                         |                         |                 |
| Shuke Nie            |                                |                                  |                                 |                         |                         |                 |
| Sigurd F. Lax        |                                |                                  |                                 |                         |                         |                 |
| Simone Piva          |                                |                                  |                                 |                         |                         |                 |
| Songqing Cui         |                                |                                  |                                 |                         |                         |                 |
| Sun Chan             |                                |                                  |                                 |                         |                         |                 |
| Spoon Wan            |                                |                                  |                                 |                         | 5                       |                 |
| T. Menter            |                                |                                  |                                 |                         |                         |                 |
| Tao Guo              |                                |                                  |                                 |                         |                         |                 |
| Tianjin Xu           |                                | 218                              | 505                             |                         |                         |                 |
| Toshiki Kuno         |                                |                                  |                                 |                         |                         |                 |
| Vittorio Pavoni      |                                |                                  |                                 |                         |                         |                 |
| Wang Wenjun          |                                |                                  |                                 |                         |                         |                 |
| Wei Zhao             |                                |                                  |                                 |                         |                         |                 |
| X. Wang              |                                |                                  |                                 |                         |                         |                 |
| Xi Xu                |                                |                                  |                                 |                         |                         |                 |
| Xiao Yu              |                                |                                  |                                 |                         |                         |                 |
| Xiaobei Feng         |                                |                                  |                                 |                         |                         | 31              |
| Xiaochen Li          |                                |                                  |                                 |                         |                         |                 |
| Xiaoli Zhang         |                                |                                  |                                 |                         |                         |                 |
| Xiao-Wei Xu          |                                |                                  |                                 |                         |                         |                 |
| Xin-Ying Zhao        |                                |                                  |                                 |                         |                         |                 |
| Yan Zhang            |                                |                                  |                                 |                         |                         |                 |
| Yi Han               |                                |                                  |                                 |                         |                         |                 |
| Yi Zheng             |                                |                                  |                                 |                         |                         |                 |
| Yingchen Du          |                                | 10                               |                                 |                         |                         | 51              |
| Yiwu Zhou            |                                |                                  |                                 |                         |                         |                 |
| Yu Chengcheng        |                                |                                  |                                 |                         |                         |                 |
| Yu Shi               |                                |                                  |                                 |                         |                         |                 |
| Yuwei Liu            |                                |                                  |                                 |                         |                         |                 |
| Zhang Yingtao        |                                |                                  |                                 |                         |                         |                 |
| Zhaowei Zhu          |                                |                                  |                                 |                         |                         |                 |
| Zhe Zhu              |                                |                                  |                                 |                         |                         |                 |
| Zhongliang Wang      |                                |                                  |                                 |                         | 5                       |                 |
| Zili Zhou            |                                |                                  |                                 |                         |                         | 16              |
| Zongnan Yang         |                                |                                  |                                 |                         |                         |                 |
| Zonghao Zhao         |                                |                                  |                                 |                         |                         |                 |

| Study                   | ICU_Arrythmia | Non ICU_Arrythmia | Mortality_Arrythmia | Survival Arrythmia | Total_Valve Heart Disease | Total_Acute Cardiac Injury | ICU_Acute Cardiac Injury |
|-------------------------|---------------|-------------------|---------------------|--------------------|---------------------------|----------------------------|--------------------------|
| Chaolin Huang           |               |                   |                     |                    |                           | 5                          | 4                        |
| Chen Chen (1)           |               |                   |                     |                    |                           |                            |                          |
| Chen Chen (2)           |               |                   |                     |                    |                           |                            |                          |
| Christopher T. Rentsch  |               |                   |                     |                    |                           |                            |                          |
| Conversano Andrea       |               |                   |                     |                    |                           |                            |                          |
| Corrado Lodigiani       |               |                   |                     |                    |                           |                            |                          |
| Daniel Gaglianni        |               |                   |                     |                    |                           |                            |                          |
| Dawei Wang (1)          | 16            | 7                 |                     |                    |                           | 10                         | 8                        |
| Dawei Wang (2)          |               |                   |                     |                    |                           | 12                         |                          |
| E Sapay                 |               |                   |                     |                    |                           |                            |                          |
| Fan Zhang               |               |                   | 3                   | 4                  |                           |                            |                          |
| Fei Zhou                |               |                   |                     |                    |                           | 33                         |                          |
| Filippo Lagi            |               |                   |                     |                    |                           |                            |                          |
| GE Heng                 |               |                   |                     |                    |                           |                            |                          |
| Grasiella Bonetti       |               |                   |                     |                    |                           |                            |                          |
| Haiying Sun             |               |                   |                     |                    |                           |                            |                          |
| He Xingwei              |               |                   |                     |                    |                           |                            |                          |
| Hua Fan                 |               |                   |                     |                    |                           |                            |                          |
| Jessica Ferguson        |               |                   |                     |                    |                           |                            |                          |
| Jianguo Zhang           |               |                   |                     |                    |                           |                            |                          |
| Jianlei Cao             | 7             | 11                |                     |                    |                           | 15                         | 6                        |
| Jiayang Zhang           |               |                   |                     |                    |                           |                            |                          |
| Joseph E. Ebinger       |               |                   |                     |                    |                           |                            |                          |
| Kun Wang (A)            |               |                   |                     |                    |                           |                            |                          |
| Kun Wang (B)            |               |                   |                     |                    |                           |                            |                          |
| Kunhua Li               |               |                   |                     |                    |                           |                            |                          |
| Kyung Soo Hong          |               |                   |                     |                    |                           | 11                         | 9                        |
| Lang Wang               |               |                   | 13                  | 22                 |                           | 70                         |                          |
| Liu Fu                  |               |                   |                     |                    |                           |                            |                          |
| Michael G Argenziano    |               |                   |                     |                    |                           |                            |                          |
| Min Cao                 |               |                   |                     |                    |                           |                            |                          |
| Mohamad Nikpouraghdam   |               |                   |                     |                    |                           |                            |                          |
| Nicola Galbazzi         |               |                   |                     |                    |                           |                            |                          |
| Peng Yudong             |               |                   |                     |                    |                           |                            | 1                        |
| Qibin Liu               |               |                   |                     |                    |                           |                            |                          |
| Qing Deng               |               |                   |                     |                    |                           |                            |                          |
| Qingchun Yao            |               |                   |                     |                    |                           |                            |                          |
| Rahul Shekhar           |               |                   |                     |                    |                           |                            |                          |
| Rong-Hui Du (1)         |               |                   |                     |                    |                           |                            |                          |
| Rong-Hui Du (2)         |               |                   |                     |                    |                           |                            |                          |
| Ruchong Chen            |               |                   |                     |                    |                           |                            |                          |
| SCOTT W. KETCHAM        |               |                   |                     |                    |                           |                            |                          |
| Shaobo Shi (1)          |               |                   |                     |                    |                           | 106                        |                          |
| Shi Tai                 |               |                   |                     |                    |                           |                            |                          |
| Tao Chen                |               |                   |                     |                    |                           | 89                         |                          |
| Tian Gu                 |               |                   |                     |                    |                           |                            |                          |
| Todd L Levy             |               |                   |                     |                    |                           |                            |                          |
| Wang Lang               |               |                   |                     |                    |                           | 27                         |                          |
| Weijie Guan             |               |                   |                     |                    |                           |                            |                          |
| Wentao Ni               |               |                   |                     |                    |                           | 49                         |                          |
| Xian Zhou               |               |                   |                     |                    |                           |                            |                          |
| Xiaobo Yang             |               |                   |                     |                    |                           | 12                         |                          |
| Xiaojing Zou            |               |                   |                     |                    |                           | 45                         | 45                       |
| Xu Chen                 |               |                   |                     |                    |                           |                            |                          |
| Yan Deng                |               |                   |                     |                    |                           | 66                         |                          |
| Yongli Zheng            |               |                   |                     |                    |                           |                            |                          |
| Yubin Liu               |               |                   |                     |                    |                           | 15                         | 11                       |
| Yi-Ping Yang            |               |                   |                     |                    |                           |                            |                          |
| Aiqi Xi                 |               |                   |                     |                    |                           |                            |                          |
| Alberto Zangrillo       | 15            |                   |                     |                    |                           |                            |                          |
| Alexander C. Kazavi     |               |                   |                     |                    |                           |                            |                          |
| Amaro Nunes Duarte-Neto |               |                   |                     |                    |                           |                            |                          |
| Anuradha Lala           |               |                   |                     |                    |                           |                            |                          |
| Arthur Simonne          |               |                   |                     |                    |                           |                            |                          |
| Benjamin T. Bradley     |               |                   |                     |                    |                           |                            |                          |
| Bicheng Zhang           |               |                   |                     |                    |                           |                            |                          |
| Bo Xu                   |               |                   |                     |                    |                           |                            |                          |
| Bo Zhou                 |               |                   |                     |                    |                           |                            |                          |
| Casas Rojo, José Manuel |               |                   |                     |                    |                           |                            |                          |
| Chaomin Wu (1)          |               |                   |                     |                    |                           |                            |                          |
| Chaomin Wu (2)          |               |                   |                     |                    |                           |                            |                          |
| Christopher M Petrilli  |               |                   |                     |                    |                           |                            |                          |
| Congliang Miao          |               |                   |                     |                    |                           |                            |                          |
| David A. Kolin          |               |                   |                     |                    |                           | 3                          |                          |
| Di Qi                   |               |                   |                     |                    |                           |                            |                          |
| E. K. Jeong             |               |                   |                     |                    |                           |                            |                          |
| Edward Itelman          |               |                   |                     |                    |                           |                            |                          |
| Elisa Bonetti           |               |                   |                     |                    |                           |                            |                          |
| F. ZHENG                |               |                   |                     |                    |                           |                            |                          |
| F.A. Klok               |               |                   |                     |                    |                           |                            |                          |
| Fan Yang                |               |                   |                     |                    |                           |                            |                          |
| Fang Liu (1)            |               |                   |                     |                    |                           | 0                          |                          |
| Fang Liu (2)            |               |                   |                     |                    |                           |                            |                          |
| Farhaan S. Vahidy       |               |                   |                     |                    |                           |                            |                          |
| Farhana Latif           |               |                   |                     |                    |                           |                            |                          |
| Fatih Osturk            |               |                   |                     |                    |                           |                            |                          |
| Fating Zhou             |               |                   |                     |                    |                           |                            |                          |
| Fei Shao                |               |                   |                     |                    |                           |                            |                          |
| Fengqing Song           |               |                   |                     |                    |                           |                            |                          |
| Francesco Bravi         |               |                   |                     |                    |                           |                            |                          |
| Franklin L. Wright      |               |                   |                     |                    |                           |                            |                          |
| Frederick S. Buckner    |               |                   |                     |                    |                           |                            |                          |
| Gabriel A Brat          |               |                   |                     |                    |                           |                            |                          |
| Giacomo Grasselli       |               |                   |                     |                    |                           |                            |                          |
| Gioel Gabriele Secco    |               |                   |                     |                    |                           |                            |                          |
| Guang Chen              |               |                   |                     |                    |                           |                            |                          |
| Guo-Qing Qian           |               |                   |                     |                    |                           |                            |                          |
| Guojin Zhang            |               |                   |                     |                    |                           | 17                         |                          |
| Helen Fogarty           |               |                   |                     |                    |                           |                            |                          |
| Helena Barrasa          |               |                   |                     |                    |                           |                            |                          |
| Heshui Shi              |               |                   |                     |                    |                           |                            |                          |
| Huan Han                |               |                   |                     |                    |                           |                            |                          |
| Huiyan Xu               |               |                   |                     |                    |                           |                            |                          |
| Hui Dai                 |               |                   |                     |                    |                           |                            |                          |
| Hui Hui                 |               |                   |                     |                    |                           |                            |                          |
| Ignasi Garcia-Oliver    |               |                   |                     |                    |                           |                            |                          |
| J. Zhang                |               |                   |                     |                    |                           |                            |                          |
| Jean-Luc Murk           |               |                   |                     |                    |                           |                            |                          |
| Jia-Fu Wei              |               |                   |                     |                    |                           |                            |                          |

| Study                | ICU_Arrythmia | Non ICU_Arrythmia | Mortality_Arrythmia | Survival Arrythmia | Total_Valve Heart Disease | Total_Acute Cardiac Injury | ICU_Acute Cardiac Injury |
|----------------------|---------------|-------------------|---------------------|--------------------|---------------------------|----------------------------|--------------------------|
| Jian Chen            |               |                   |                     |                    |                           |                            |                          |
| Jian Wu              |               |                   |                     |                    |                           |                            |                          |
| Jiangshan Lian (1)   |               |                   |                     |                    |                           |                            |                          |
| Jiangshan Lian (2)   |               |                   |                     |                    |                           |                            |                          |
| Jianhong Fu          |               |                   |                     |                    |                           |                            |                          |
| Jiaofeng Huang       |               |                   |                     |                    |                           |                            |                          |
| Jie Chen             |               |                   |                     |                    |                           |                            |                          |
| Jing Yuan            |               |                   |                     |                    |                           |                            |                          |
| Jin-jin Zhang        |               |                   |                     |                    |                           |                            |                          |
| Julie Helms          |               |                   |                     |                    |                           |                            |                          |
| Jun Fei              |               |                   |                     |                    |                           |                            |                          |
| Juan Zhang           |               |                   |                     |                    |                           |                            |                          |
| K. Wang              |               |                   |                     |                    |                           |                            |                          |
| Kajjin Xu            |               |                   |                     |                    |                           |                            |                          |
| Kim Lindsay          |               |                   |                     |                    |                           |                            |                          |
| Kui Liu              |               |                   |                     |                    |                           |                            |                          |
| Lei Gao              |               |                   |                     |                    |                           |                            |                          |
| Leonidas Palaiodimos |               |                   |                     |                    |                           |                            |                          |
| Li Yin               |               |                   |                     |                    |                           |                            |                          |
| Li Zhang             |               |                   |                     |                    | 3                         | 18                         |                          |
| Lijiao Zeng          |               |                   |                     |                    |                           |                            |                          |
| Lijun Sun            |               |                   |                     |                    |                           |                            |                          |
| Ling Mao             |               |                   |                     |                    |                           |                            |                          |
| Lu lin               |               |                   |                     |                    |                           |                            |                          |
| Marco Vicenzi        |               |                   |                     |                    |                           |                            |                          |
| Matt Arentz          |               |                   |                     |                    |                           |                            |                          |
| Matthew Cummings     |               |                   |                     |                    |                           |                            |                          |
| Mingyue Li           |               |                   |                     |                    |                           |                            |                          |
| Miriam Estébanez     |               |                   |                     |                    |                           |                            |                          |
| Nan Hong             |               |                   |                     |                    |                           |                            |                          |
| Nanshan Chen         |               |                   |                     |                    |                           |                            |                          |
| Neo Poyiadji         |               |                   |                     |                    |                           |                            |                          |
| P. Demelo-Rodriguez  |               |                   |                     |                    |                           |                            |                          |
| Paolo Giorzi Rassi   |               |                   |                     |                    |                           |                            |                          |
| Pingheng Mo          |               |                   |                     |                    |                           |                            |                          |
| Qiao Shi             |               |                   |                     |                    |                           |                            |                          |
| Qingqiang Chen       |               |                   |                     |                    |                           |                            |                          |
| Qingxian Cai (1)     |               |                   |                     |                    |                           |                            |                          |
| Qingxian Cai (2)     |               |                   |                     |                    |                           |                            |                          |
| Qiarong Ruan         |               |                   |                     |                    |                           |                            |                          |
| Rajesh Bhatnara      |               |                   |                     |                    |                           |                            |                          |
| Ramin Sami           |               |                   |                     |                    |                           |                            |                          |
| Riccardo M. Inciardi |               |                   |                     |                    |                           |                            |                          |
| Rohan Kherra         |               |                   |                     |                    |                           | 1                          |                          |
| Rui Liu              |               |                   |                     |                    |                           |                            |                          |
| Ruqing Li            |               |                   |                     |                    |                           |                            |                          |
| Ruyuan He            |               |                   |                     |                    |                           |                            |                          |
| Safiya Richardson    |               |                   |                     |                    |                           |                            |                          |
| Saskia Middeldorp    |               |                   |                     |                    |                           |                            |                          |
| Shaobo Shi (2)       |               |                   |                     |                    |                           | 82                         |                          |
| Shashank Jain        |               |                   |                     |                    |                           |                            |                          |
| Shen Xu              |               |                   |                     |                    |                           |                            |                          |
| Shengmei Niu         |               |                   |                     |                    |                           |                            |                          |
| Shuai Zhao           |               |                   |                     |                    |                           |                            |                          |
| Shuke Nie            |               |                   |                     |                    |                           |                            |                          |
| Sigurd F. Lax        |               |                   |                     |                    |                           |                            |                          |
| Simone Piva          |               |                   |                     |                    |                           |                            |                          |
| Songqing Cui         |               |                   |                     |                    |                           |                            |                          |
| Sun Chan             |               |                   |                     |                    |                           |                            |                          |
| Suzon Wan            |               |                   |                     |                    |                           | 10                         |                          |
| T. Menter            |               |                   |                     |                    |                           |                            |                          |
| Tao Guo              |               |                   |                     |                    |                           |                            |                          |
| Tamen Xu             |               |                   |                     |                    |                           |                            |                          |
| Toshiki Kuno         |               |                   |                     |                    |                           | 2312                       |                          |
| Vittorio Pavoni      |               |                   |                     |                    |                           |                            |                          |
| Wang Wenjun          |               |                   |                     |                    |                           |                            |                          |
| Wei Zhao             |               |                   |                     |                    |                           |                            |                          |
| X. Wang              |               |                   |                     |                    |                           |                            |                          |
| Xi Xu                |               |                   |                     |                    |                           |                            |                          |
| Xiao Yu              |               |                   |                     |                    |                           |                            |                          |
| Xiaobo Feng          |               |                   |                     |                    |                           | 28                         |                          |
| Xiaochen Li          |               |                   |                     |                    |                           | 119                        |                          |
| Xiaoli Zhang         |               |                   |                     |                    |                           |                            |                          |
| Xiao-Wei Xu          |               |                   |                     |                    |                           |                            |                          |
| Xin-Ying Zhao        |               |                   |                     |                    |                           |                            |                          |
| Yan Zhang            |               |                   |                     |                    |                           | 19                         |                          |
| Yi Han               |               |                   |                     |                    |                           |                            |                          |
| Yi Zheng             |               |                   |                     |                    |                           | 13                         | 13                       |
| Yingchen Du          |               |                   | 51                  |                    |                           | 38                         |                          |
| Yiwu Zhou            |               |                   |                     |                    |                           |                            |                          |
| Yu Chengcheng        |               |                   |                     |                    |                           |                            |                          |
| Yu Shi               |               |                   |                     |                    |                           |                            |                          |
| Yuwei Liu            |               |                   |                     |                    |                           |                            |                          |
| Zhang Yingtao        |               |                   |                     |                    | 2                         |                            |                          |
| Zhaowei Zhu          |               |                   |                     |                    |                           |                            |                          |
| Zhe Zhu              |               |                   |                     |                    |                           |                            |                          |
| Zhongliang Wang      |               |                   |                     |                    |                           |                            |                          |
| Zili Zhou            |               |                   |                     |                    |                           |                            |                          |
| Zongqian Yang        |               |                   |                     |                    |                           |                            |                          |
| Zonghao Zhao         |               |                   |                     |                    |                           |                            |                          |



| Study                   | Non ICU_Acute Cardiac Injury | Mortality_Acute Cardiac Injury | Survival_Acute Cardiac Injury | ICU_Tachycardia | ICU_Mortality | Non ICU_Mortality |
|-------------------------|------------------------------|--------------------------------|-------------------------------|-----------------|---------------|-------------------|
| Chaolin Huang           | 1                            |                                |                               |                 | 5             | 1                 |
| Chen Chen (1)           |                              |                                |                               |                 | 10            | 1                 |
| Chen Chen (2)           |                              |                                |                               |                 |               |                   |
| Christopher T. Rentsch  |                              |                                |                               |                 |               |                   |
| Conversano Andrea       |                              |                                |                               |                 |               |                   |
| Corrado Lodigiani       |                              |                                |                               |                 |               |                   |
| Daniel Gaganiis         |                              |                                |                               |                 | 3             | 1                 |
| Dawei Wang (1)          | 2                            |                                |                               |                 |               |                   |
| Dawei Wang (2)          |                              | 8                              | 4                             |                 |               |                   |
| E Sapay                 |                              |                                |                               |                 |               |                   |
| Fan Zhang               |                              |                                |                               |                 |               |                   |
| Fei Zhou                |                              | 32                             | 1                             |                 |               |                   |
| Filippo Lagi            |                              |                                |                               |                 | 3             | 5                 |
| GE Heng                 |                              |                                |                               |                 |               |                   |
| Graziella Bonetti       |                              |                                |                               |                 |               |                   |
| Haiying Sun             |                              |                                |                               |                 |               |                   |
| He Jingwei              |                              |                                |                               |                 |               |                   |
| Hua Fan                 |                              |                                |                               |                 |               |                   |
| Jessica Ferguson        |                              |                                |                               |                 |               |                   |
| Jianguo Zhang           |                              |                                |                               |                 | 18            |                   |
| Jianfei Cao             | 9                            |                                |                               |                 |               |                   |
| Jiayang Zhang           |                              |                                |                               |                 |               |                   |
| Joseph E. Ebinger       |                              |                                |                               |                 |               |                   |
| Kun Wang (A)            |                              |                                |                               |                 |               |                   |
| Kun Wang (B)            |                              |                                |                               |                 |               |                   |
| Kunhua Li               |                              |                                |                               |                 |               |                   |
| Kyung Soo Hong          | 2                            |                                |                               |                 | 4             | 1                 |
| Lang Wang               |                              | 39                             | 31                            |                 |               |                   |
| Liu Fu                  |                              |                                |                               |                 |               |                   |
| Michael G Argenziano    |                              |                                |                               |                 | 103           | 86                |
| Min Cao                 |                              |                                |                               |                 |               |                   |
| Mohamad Nikpouraghdam   |                              |                                |                               |                 |               |                   |
| Nicola Gaibazzi         |                              |                                |                               |                 |               |                   |
| Peng Yudong             | 2                            |                                |                               |                 | 11            | 6                 |
| Qibin Liu               |                              |                                |                               |                 |               |                   |
| Qing Deng               |                              |                                |                               |                 |               |                   |
| Qingchun Yao            |                              |                                |                               |                 |               |                   |
| Rahul Shekhar           |                              |                                |                               |                 | 13            | 0                 |
| Rong-Hui Du (1)         |                              |                                |                               |                 |               |                   |
| Rong-Hui Du (2)         |                              |                                |                               |                 |               |                   |
| Ruchong Chen            |                              |                                |                               |                 |               |                   |
| SCOTT W. KETCHAM        |                              |                                |                               |                 | 2             | 0                 |
| Shaobo Shi (1)          |                              | 20                             | 86                            |                 |               |                   |
| Shi Tai                 |                              |                                |                               |                 |               |                   |
| Tao Chen                |                              | 72                             | 18                            |                 |               |                   |
| Tian Gu                 |                              |                                |                               |                 |               |                   |
| Todd J. Levy            |                              |                                |                               |                 |               |                   |
| Wang Lang               |                              | 17                             | 10                            |                 |               |                   |
| Wei-je Guan             |                              |                                |                               |                 |               |                   |
| Wentao Ni               |                              | 35                             | 14                            |                 |               |                   |
| Xian Zhou               |                              |                                |                               |                 |               |                   |
| Xiaobo Yang             |                              | 9                              | 3                             |                 |               |                   |
| Xiaojing Zou            |                              | 34                             | 11                            |                 |               |                   |
| Xu Chen                 |                              |                                |                               |                 | 1             | 1                 |
| Yan Deng                |                              | 65                             | 1                             |                 |               |                   |
| Yongli Zheng            |                              |                                |                               |                 |               |                   |
| Youbin Liu              | 4                            | 1                              | 14                            |                 |               |                   |
| Yu-Peng Yang            |                              |                                |                               |                 |               |                   |
| Aiqi Xi                 |                              |                                |                               |                 |               |                   |
| Alberto Zangrillo       |                              |                                |                               |                 | 14            | 3                 |
| Alexander C. Kazavi     |                              |                                |                               |                 |               |                   |
| Amaro Nunes Duarte-Neto |                              |                                |                               |                 | 7             | 3                 |
| Anuradha Lala           |                              |                                |                               |                 |               |                   |
| Arthur Simonne          |                              |                                |                               |                 |               |                   |
| Benjamin T. Bradley     |                              |                                |                               |                 |               |                   |
| Bicheng Zhang           |                              |                                |                               |                 |               |                   |
| Bo XU                   |                              |                                |                               |                 |               |                   |
| Bo Zhou                 |                              |                                |                               |                 |               |                   |
| Casas-Rejo, José Manuel |                              |                                |                               |                 |               |                   |
| Chaomin Wu (1)          |                              |                                |                               |                 |               |                   |
| Chaomin Wu (2)          |                              |                                |                               |                 | 43            |                   |
| Christopher M Petrilli  |                              |                                |                               |                 |               |                   |
| Congliang Miao          |                              |                                |                               |                 |               |                   |
| David A. Kolin          |                              |                                |                               |                 |               |                   |
| Di Qi                   |                              |                                |                               |                 |               |                   |
| E.K.Leong               |                              |                                |                               |                 |               |                   |
| Edward Reiman           |                              |                                |                               |                 |               |                   |
| Elsa Bonetti            |                              |                                |                               |                 |               |                   |
| F. ZHENG                |                              |                                |                               |                 |               |                   |
| F.A. Klok               |                              |                                |                               |                 | 23            |                   |
| Fan Yang                |                              |                                |                               |                 |               |                   |
| Fang Liu (1)            |                              |                                |                               |                 |               |                   |
| Fang Liu (2)            |                              |                                |                               |                 |               |                   |
| Farhaan S. Vahidy       |                              |                                |                               |                 |               |                   |
| Farhana Latif           |                              |                                |                               |                 |               |                   |
| Faith Ostrick           |                              |                                |                               |                 |               |                   |
| Fating Zhou             |                              |                                |                               |                 |               |                   |
| Fei Shao                |                              |                                |                               |                 |               |                   |
| Fengxiang Song          |                              |                                |                               |                 |               |                   |
| Francesca Bravi         |                              |                                |                               |                 |               |                   |
| Franklin L. Wright      |                              |                                |                               |                 |               |                   |
| Frederick S. Buckner    |                              |                                |                               |                 |               |                   |
| Gabriel A Brat          |                              |                                |                               |                 |               |                   |
| Giacomo Grasselli       |                              |                                |                               |                 |               |                   |
| Gioel Gabriel Secco     |                              |                                |                               |                 |               |                   |
| Guang Chen              |                              |                                |                               |                 |               |                   |
| Guo-Qing Qian           |                              |                                |                               |                 |               |                   |
| Guoqi Zhang             |                              |                                |                               |                 | 9             | 3                 |
| Helen Fogarty           |                              |                                |                               |                 |               |                   |
| Helena Barrasa          |                              |                                |                               |                 | 16            |                   |
| Heshui Shi              |                              |                                |                               |                 |               |                   |
| Huan Han                |                              |                                |                               |                 |               |                   |
| Huayun Xu               |                              |                                |                               |                 |               |                   |
| Hui Dai                 |                              |                                |                               |                 |               |                   |
| Hui Hui                 |                              |                                |                               | 3               |               |                   |
| Ignasi Garcia-Olive     |                              |                                |                               |                 |               |                   |
| J. Zhang                |                              |                                |                               |                 |               |                   |
| Jean-Luc Murk           |                              |                                |                               |                 |               |                   |
| Jia-Fu Wei              |                              |                                |                               |                 |               |                   |

| Study                | Non ICU_Acute Cardiac Injury | Mortality_Acute Cardiac Injury | Survival_Acute Cardiac Injury | ICU_Tachycardia | ICU_Mortality | Non ICU_Mortality |
|----------------------|------------------------------|--------------------------------|-------------------------------|-----------------|---------------|-------------------|
| Jian Chen            |                              |                                |                               |                 | 101           |                   |
| Jian Wu              |                              |                                |                               |                 |               |                   |
| Jiangshan Lian (1)   |                              |                                |                               |                 |               |                   |
| Jiangshan Lian (2)   |                              |                                |                               |                 |               |                   |
| Jianhong Fu          |                              |                                |                               |                 |               |                   |
| Jiaofeng Huang       |                              |                                |                               |                 |               |                   |
| Jie Chen             |                              |                                |                               |                 |               |                   |
| Jing Yuan            |                              |                                |                               |                 |               |                   |
| Jin-jin Zhang        |                              |                                |                               |                 |               |                   |
| Julie Helms          |                              |                                |                               |                 |               |                   |
| Jun Fei              |                              |                                |                               |                 |               |                   |
| Jun Zhang            |                              |                                |                               |                 |               |                   |
| K. Wang              |                              |                                |                               |                 |               |                   |
| Kajin Xu             |                              |                                |                               |                 |               |                   |
| Kim Lindsay          |                              |                                |                               |                 |               |                   |
| Kui Liu              |                              |                                |                               |                 |               |                   |
| Lei Gao              |                              |                                |                               |                 |               |                   |
| Leonidas Palaiodimos |                              |                                |                               |                 |               |                   |
| Li Yin               |                              |                                |                               |                 |               |                   |
| Li Zhang             |                              |                                |                               |                 |               |                   |
| Lijiao Zeng          |                              |                                |                               |                 |               |                   |
| Lijun Sun            |                              |                                |                               |                 |               |                   |
| Ling Mao             |                              |                                |                               |                 |               |                   |
| Lu lin               |                              |                                |                               |                 |               |                   |
| Marco Vicenzi        |                              |                                |                               |                 |               |                   |
| Matt Krenz           |                              |                                |                               |                 |               |                   |
| Matthew C Cummings   |                              |                                |                               |                 |               |                   |
| Mingyue Li           |                              |                                |                               |                 |               |                   |
| Miriam Estebanez     |                              |                                |                               |                 |               |                   |
| Nian Hong            |                              |                                |                               |                 |               |                   |
| Nanshan Chen         |                              |                                |                               |                 |               |                   |
| Neo Poyiadji         |                              |                                |                               |                 |               |                   |
| P. Demelo-Rodriguez  |                              |                                |                               |                 |               |                   |
| Paolo Grossi Rossi   |                              |                                |                               |                 |               |                   |
| Pingcheng Mo         |                              |                                |                               |                 |               |                   |
| Qiao Shi             |                              | 53                             |                               |                 |               |                   |
| Qingqing Chen        |                              |                                |                               |                 |               |                   |
| Qinglan Cai (1)      |                              |                                |                               |                 |               |                   |
| Qinglan Cai (2)      |                              |                                |                               |                 |               |                   |
| Qiuorong Ruan        |                              |                                |                               |                 |               |                   |
| Rajesh Bhayana       |                              |                                |                               |                 |               |                   |
| Rames Sami           |                              |                                |                               |                 |               |                   |
| Riccardo M. Inciardi |                              |                                |                               |                 |               |                   |
| Rohan Khera          |                              |                                |                               |                 |               |                   |
| Ru Liu               |                              |                                |                               |                 |               |                   |
| Ruoqing Li           |                              |                                |                               |                 |               |                   |
| Ruyuan He            |                              |                                |                               |                 |               |                   |
| Saffya Richardson    |                              |                                |                               |                 | 291           | 262               |
| Saskia Middeldorp    |                              |                                |                               |                 |               |                   |
| Shaobo Shi (2)       | 42                           |                                | 40                            |                 |               |                   |
| Shashank Jain        |                              |                                |                               |                 |               |                   |
| Shen Xu              |                              |                                |                               |                 |               |                   |
| Shengmei Niu         |                              |                                |                               |                 |               |                   |
| Shuai Zhao           |                              |                                |                               |                 |               |                   |
| Shuke Nie            |                              |                                |                               |                 |               |                   |
| Sigurd F. Lax        |                              |                                |                               |                 |               |                   |
| Simone Piva          |                              |                                |                               |                 | 1             |                   |
| Songping Cui         |                              |                                |                               |                 |               |                   |
| Sun Chan             |                              |                                |                               |                 |               |                   |
| Suixin Wan           |                              |                                |                               |                 |               |                   |
| T. Menter            |                              |                                |                               |                 |               |                   |
| Tao Guo              |                              |                                |                               |                 |               |                   |
| Tianxi Xu            |                              |                                |                               |                 |               |                   |
| Toshiki Kuno         | 954                          |                                | 1358                          |                 |               |                   |
| Vittorio Pavoni      |                              |                                |                               |                 | 5             |                   |
| Wang Wenjun          |                              |                                |                               |                 |               |                   |
| Weiz Zhao            |                              |                                |                               |                 |               |                   |
| X. Wang              |                              |                                |                               |                 |               |                   |
| Xi Xu                |                              |                                |                               |                 |               |                   |
| Xiao Yu              |                              |                                |                               |                 |               |                   |
| Xiaobo Feng          |                              |                                |                               |                 |               |                   |
| Xiaochen Li          |                              |                                |                               |                 |               |                   |
| Xiaoli Zhang         |                              |                                |                               |                 |               |                   |
| Xiao-Wei Ku          |                              |                                |                               |                 |               |                   |
| Xin-Ying Zhao        |                              |                                |                               |                 |               |                   |
| Yan Zhang            |                              |                                |                               |                 |               |                   |
| Yi Han               |                              |                                |                               |                 |               |                   |
| Yi Zheng             | 0                            |                                | 13                            |                 |               |                   |
| Yingchen Du          | 38                           |                                |                               |                 |               |                   |
| Yiyu Zhou            |                              |                                |                               |                 |               |                   |
| Yu Chengcheng        |                              |                                |                               |                 |               |                   |
| Yuzhi                |                              |                                |                               |                 |               |                   |
| Yuwei Liu            |                              |                                |                               |                 |               |                   |
| Zhang Yingtao        |                              |                                |                               |                 |               |                   |
| Zhaowei Zhu          |                              |                                |                               |                 |               |                   |
| Zhe Zhu              |                              |                                |                               |                 |               |                   |
| Zhongliang Wang      |                              |                                |                               |                 |               |                   |
| Zili Zhou            |                              |                                |                               |                 |               |                   |
| Zongqiao Yang        |                              |                                |                               |                 |               |                   |
| Zonghao Zhao         |                              |                                |                               |                 |               |                   |
